# Supplementary material for: Screening of Insecticidal and Antifungal Activities of the Culturable Fungi Isolated from the Intertidal Zones of Qingdao, China
Source: J Fungi (Basel). 2022 Nov 24;8(12):1240. doi: 10.3390/jof8121240 (PMC9783798; doi:10.3390/jof8121240)
Supplement: Supplementary file 1 [file jof-08-01240-s001.zip › Table S1-The information of 181 fungal strains.xlsx]

## Sheet: Sheet1
StrainID	Genus	Species	Family	Order	Class	Phylum	Substrate	City	Reference species from megaBLASTn	ITS sequences	Similarity	Accession No.
AS51	Plectosphaerella	slobbergiarum	Glomerellaceae	Glomerellales	Sordariomycetes	Ascomycota	algae	Qingdao	Plectosphaerella slobbergiarum CBS 147227/2022.10.02	GTGGATTTTACGTCTCGTTGGTGACCAGCGGAGGGATCATTACTGAGTACTACACTCTCTACCCTTTGTGAACTATTATACCTGTTGCTTCGGCGGCGCCCGCAAGGGTGCCCGCCGGTCTCATCAGAATCTCTGTTTTCGAACCCGACGATACTTCTGAGTGTTCTTAGCGAACTGTCAAAACTTTTAACAACGGATCTCTTGGCTCCAGCATCGATGAAGAACGCAGCGAAACGCGATATGTAATGTGAATTGCAGAATTCAGTGAATCATCGAATCTTTGAACGCACATGGCGCCTTCCAGTATCCTGGGAGGCATGCCTGTCCGAGCGTCGTTTCAACCCTCGAGCCCCTGTGGCCCGGCGTTGGGGATCTGCCACGGCAGGCCCCTAAAACCAG…	98.527%	NR_173021.1
AS31	Cephalotrichum	microsporum	Microascaceae	Microascales	Sordariomycetes	Ascomycota	algae	Qingdao	--	--
AS22	Chrysosporium	lobatum	Onygenaceae	Onygenales	Eurotiomycetes	Ascomycota	algae	Qingdao	Chrysosporium lobatum CBS 666.78/2022.10.02	GTGATGTATGCTTCCGTAGGTGACCTGCGGAAGGATCATTACCGTGCCGGGGGCCCTTCGGGGTCCCATTGTGCCACCCGTGTTTACTTGTACCTGTTGCTTCGGCGGGCCTGCGGGCCTCGCTCGCTGCCGGGGGACCTAGTCCCCGGGCGCGTGCCCGCCGGAGACACACTAAACTTCTCTAACGGATACGTCTGAGCCAATGATCTAATCATTAAAACTTTCAACAACGGATCTCTTGGTTCCCACATCGATGAAGAACGCAGCGAAATGCGATAAGTAATGTGAATTGCAGAATTCCGTGAATCATCGAATCTTTGAACGCACATTGCGCCCCCTGGTATTCCGGGGGGCATGCCTGTCCGAGCGTCATTGCAACCCTCAAGCGCGGCTTGCGTG…	97.718%	NR_111087.1
AS5	Alternaria	alstroemeriae	Pleosporaceae	Pleosporales	Dothideomycetes	Ascomycota	algae	Qingdao	Alternaria alstroemeriae CBS 118809/2022.10.02	GGCCTAGTATGAGGCGGGCTGGACCTCTCGGGGTTACAGCCTTGCTGAATTATTCACCCTTGTCTTTTGCGTACTTCTTG TTTCCTTGGTGGGTTCGCCCACCACTAGGACAAACATAAACCTTTTGTAATTGCAATCAGCGTCAGTAACAAATTAATAA TTACAACTTTCAACAACGGATCTCTTGGTTCTGGCATCGATGAAGAACGCAGCGAAATGCGATAAGTAGTGTGAATTGCA GAATTCAGTGAATCATCGAATCTTTGAACGCACATTGCGCCCTTTGGTATTCCAAAGGGCATGCCTGTTCGAGCGTCATT TGTACCCTCAAGCTTTGCTTGGTGTTGGGCGTCTTGTCTCTAGCTTTGCTGGAGACTCGCCTTAAAGTAATTGGC…	0.9943	NR_163686.1
AS34	Eucasphaeria	sp.	Niessliaceae	Hypocreales	Sordariomycetes	Ascomycota	algae	Qingdao	--	--
AS68	Trichothecium	roseum	unspecified	Hypocreales	Sordariomycetes	Ascomycota	algae	Qingdao	Trichothecium roseum strain RiT-3/2022.10.02	CTGCCTTCTGTCTCGTTGGTGACCAGCGGAGGGATCATTATAGAGTTAACAAAACAACTCCCAACCCTTTGTGAACCTTACCTACCGTTGCTTCGGCGGACCGCCCCGGGCGCTGCGTGCCCCGGACCCAAGGCGCCCGCCGGGGACCACACGAACCCTGTTTAACAAACATGTGTATCCTCTGAGCGAGCCGAAAGGCAACAAAACAAATCAAAACTTTCAACAACGGATCTCTTGGTTCTGGCATCGATGAAGAACGCAGCGAAATGCGATAAGTAATGTGAATTGCAGAATTCAGTGAATCATCGAATCTTTGAACGCACATTGCGCCCGCCAGTATTCTGGCGGGCATGCCTGTCCGAGCGTCATTTCAACCCTCGGGCCCCCCCCTTTTCCCCT…	99.68%	MW478332.1
AS43	Mucor	hiemalis	Mucoraceae	Mucorales	Mucoromycetes	Mucoromycota	algae	Qingdao	Mucor hiemalis f. hiemalis CBS 201.65/2022.10.02	GGCTATCTTTAGATGGCCTTTGCTAGTTTTCTAGCGAATGGTTCATTCTTTTTTACTGTGAACTGTTTTAATTTTTCAGC GTCTGAGGAATGTCTTTTAGCCATAGGGATAGGCTACTAGAATGTTAACCGAGCTGAAAGTCAGGCTTAGGCCTGGTATC CTATTAATTATTTACCAAAAGAATTCAGTATTATAATTGTAACATAAGCGTAAAAAACTTATAAAACAACTTTTAACAAC GGATCTCTTGGTTCTCGCATCGATGAAGAACGTAGCAAAGTGCGATAACTAGTGTGAATTGCATATTCAGTGAATCATCG AGTCTTTGAACGCAACTTGCGCTCAATGGTATTCCATTGAGCACGCCTGTTTCAGTATCAAAAACACCCCACATT…	0.9623	NR_152948.1
AS70	Fusarium	fujikuroi	Nectriaceae	Hypocreales	Sordariomycetes	Ascomycota	algae	Qingdao	Fusarium fujikuroi CBS 221.76/2022.10.02	AATCCGACCTAACTCCCAACCCCTGTGAACATACCAATTGTTGCCTCGGCGGATCAGCCCGCTCCCGGTAAAACGGGACGGCCCGCCAGAGGACCCCTAAACTCTGTTTCTATATGTAACTTCTGAGTAAAACCATAAATAAATCAAAACTTTCAACAACGGATCTCTTGGTTCTGGCATCGATGAAGAACGCAGCAAAATGCGATAAGTAATGTGAATTGCAGAATTCAGTGAATCATCGAATCTTTGAACGCACATTGCGCCCGCCAGTATTCTGGCGGGCATGCCTGTTCGAGCGTCATTTCAACCCTCAAGCCCCCGGGTTTGGTGTTGGGGATCGGCGAGCCCTTGCGGCAAGCCGGCCCCGAAATCTAGTGGCGGTCTCGCTGCAGCTTCCAT…	99.803%	NR_111889.1
AS41	Alternaria	phragmospora	Pleosporaceae	Pleosporales	Dothideomycetes	Ascomycota	algae	Qingdao	Alternaria phragmospora ATCC 18914 /2022.10.02	GAACCGTTTTGGTCTTCGTAGGTGACCTGCGGAGGGATCATTACACAATAAGAAGGCGGGCTGGATACCCCCAGCAGTGCGTTGCTTCGCGGCGTGCGCTGTTGGGCCGGCCTTGCTGAATTATTCACCCGTGTCTTTTGCGTACTTCTTGTTTCCTTGGTGGGCTCGCCCACCACAAGGACAACCCCATAAACCTTTTTGTAATAGCAATCAGCGTCAGTAACAATGTAATAATTACAACTTTCAACAACGGATCTCTTGGTTCTGGCATCGATGAAGAACGCAGCGAAATGCGATACGTAGTGTGAATTGCAGAATTCAGTGAATCATCGAATCTTTGAACGCACATTGCGCCCTTTGGTATTCCAAAGGGCATGCCTGTTCGAGCGTCATTTGTAC…	99.31%	NR_135960.1
AS45	Paecilomyces	sp.	Clavicipitaceae	Hypocreales	Sordariomycetes	Ascomycota	algae	Qingdao	--	--
AS56	Knufia	petricola	Trichomeriaceae	Chaetothyriales	Eurotiomycetes	Ascomycota	algae	Qingdao	Knufia petricola CBS 726.95/2022.10.02	CAGTTTGAGTCAAGAGTTGACCGGCGGGACGATCAGTAGCGAATTACGGTTTCGCCTCCGGAGCCCGGCCGCCCAACCCTTGGTCTAATTTACCTTGTCGTTGCTTCCGCGGACCGGTTGACCAACTGGTCTTGACCGCCGGGGGGGCTTCCCCCCCTGGAGAGCGTCCGCCGACGGCCCAACCACAAAACTCTTGTACCAAACCATGTCGTCTGAATGTACTTGATTAAGAATCAAAAAACAAAACTTTCAACAACGGATCTCTTGGTTCTGGCATCGATGAAGAACGCAGCGAAATGCGATAAGTAATGCGAATTGCAGAATTTCCGTGAGTCATCGAATCTTTGAACGCACATTGCGCCCACTGGTATTCCGGTGGGCATGCCTGTTCGAGCGTCA…	97.138%	NR_111871.1
AS29	Neodevriesia	cladophorae	Neodevriesiaceae	Capnodiales	Dothideomycetes	Ascomycota	algae	Qingdao	Neodevriesia cladophorae voucher OUCMBI110119/2022.10.02	AATGCGTAACTCTTACCGAGCGAGGGCGCCCCGCCGCCCGACCTCCCAACCCTTTGATTTGATCAAGACC GCCTTCTGCCTCGGGGGTGACCCGGCCTTCGGGCCCGCGGTCCCCCCGGTGGTCACACACACAACCCTGC ATCAATGGTCGTCCGAGTCAATTGTAAATTCAATCAAAACTTTCAACAACGGATCTCTTGGTTCTGGCAT CGATGAAGAACGCAGCGAAATGCGATAAGTAATGTGAATTGCAGAATTCAGTGAATCATCGAATCTTTGA ACGCACATTGCGCCCCCTGGCATTCCGGGGGGCATGCCTGTTCGAGCGTCATTACACCAATCAAGCCTGG CTTGGTATTGGGCGACGGGGCCGTCACACGCCCCGCGCCCCAAT…	99.26%	KU578112.1
AS18	Neodevriesia	sp.	Neodevriesiaceae	Capnodiales	Dothideomycetes	Ascomycota	algae	Qingdao	Neodevriesia metrosideri/2022.10.02	TAGGTGAACCTGCGGAGGGATCATTACCGAGTGGAGGGCGCTCCGGCGCCCGACCTCCCAACCCTTTGAT TTGATCAAGACCTCTTTATGCCTCGGGGGCGACCCGGCCGTCGCCGGCTCGCGGTCCCCCCGGCGGCGCC CTCAAACTCTGCATCAATTGTCGTCGGATGATAAAGTTAATAAATCAAAACTTTCAACAACGGATCTCTT GGTTCTGGCATCGATGAAGAACGCAGCGAAATGCGATAAGTAATGTGAATTGCAGAATTCAGTGAATCAT CGAATCTTTGAACGCACATTGCGCCCTTTGGCATTCCGAAGGGCATGCCTGTTCGAGCGTCATTACACCA ATCAAGCCTGGCTTGGTATTGGGCGACGGGGCCGCCTCGCCGGC…	92.196%	NR_161141.1
AS19	Capnobotryella	sp.	Teratosphaeriaceae	Capnodiales	Dothideomycetes	Ascomycota	algae	Qingdao	--	--
AS13	Aspergillus	niger	Aspergillaceae	Eurotiales	Eurotiomycetes	Ascomycota	algae	Qingdao	--	--
AS11	Aspergillus	gracilis	Aspergillaceae	Eurotiales	Eurotiomycetes	Ascomycota	algae	Qingdao	--	--
AS9	Apiospora	rasikravindrae	Apiosporaceae	Xylariales	Sordariomycetes	Ascomycota	algae	Qingdao	Apiospora rasikravindrae NFCCI 2144/2022.10.02	GGGGCTTAGTTAACACTCCCACACCATTTGCCAACTTTACTCAGTTATGCCTCGGCGTAAGCTCCGTACGGGGCTGCCGG GTTGCGCTGCGGGCGACAGCTACCCTGTAGCTTACCCTGTAGCGCTACCCTGTAGCGTTACCCTGCGGCGGCCCGCCGGT GGAAACGAAACTCTTGTTTTATTGTATCTTCTGAGCGTCTTATTTTAATAAGTTAAAACTTTCAACAACGGATCTCTTGG TTCTGGCATCGATGAAGAACGCAGCGAAATGCGATAAGTAATGTGAATTGCAGAATTCAGTGAATCATCGAATCTTTGAA CGCACATTGCGCCCATCAGTATTCTGGTGGGCATGCCTGTTCGAGCGTCATTTCAACCCTTAAGCCTAGCTTAGT…	0.9948	NR_119932.1
AS28	Clonostachys	aranearum	Bionectriaceae	Hypocreales	Sordariomycetes	Ascomycota	algae	Qingdao	Clonostachys aranearum GZAC QLS0625/2022.10.02	GTTGGCTCGACGCACTCCCAAACCCATGTGAACATACCTACTGTTGCTTCGGCGGGATTGCCCCGGGCGCCTCGTGTGCCCCGGACCAGGCGCCCGCCTAGGAAACTTAATTCTTGTTTTATTTTGGAATCTTCTGAGTAGTTTTTACAAATAAATAAAAACTTTCAACAACGGATCTCTTGGTTCTGGCATCGATGAAGAACGCAGCGAAATGCGATAAGTAATGTGAATTGCAGAATTCAGTGAATCATCGAATCTTTGAACGCACATTGCGCCCGCCAGTATTCTGGCGGGCATGCCTGTCTGAGCGTCATTTCAACCCTCATGCCCCTAGGGCGTGGTGTTGGGGATCGGCCAAAGCCCGCGAGGGACGGCCGGCCCCTAAATCTAGTGGCGGAC…	99.057%	NR_164542.1
AS36	Peroneutypa	scoparia	Diatrypaceae	Xylariales	Sordariomycetes	Ascomycota	algae	Qingdao	--	--
AS37	Fusarium	ngaiotongaense	Nectriaceae	Hypocreales	Sordariomycetes	Ascomycota	algae	Qingdao	Fusarium ngaiotongaense CBS 126407/2022.10.02	AATACGGACTATTCACTCATCACCCTGTGAACATACCTAAACGTTGCTTCGGCGGGAATAGACGGCCCCGTGAAACGGGCCGCCCCCGCCAGAGGACCCTTAACTCTGTTTCTATAATGTTTCTTCTGAGTAAAACAAGCAAATAAATTAAAACTTTCAACAACGGATCTCTTGGCTCTGGCATCGATGAAGAACGCAGCGAAATGCGATAAGTAATGTGAATTGCAGAATTCAGTGAATCATCGAATCTTTGAACGCACATTGCGCCCGCCAGTATTCTGGCGGGCATGCCTGTTCGAGCGTCATTACAACCCTCAGGCCCCCGGGCCTGGCGTTGGGGATCGGCGGAGCCCCCCGTGGGCACACGCCGTCCCCCAAATACAGTGGCGGTCCCGCCGC…	98.651%	NR_178144.1
AS20	Chaetomium	globosum	Chaetomiaceae	Sordariales	Sordariomycetes	Ascomycota	algae	Qingdao	--	--
AS10	Ascotricha	longipila	Xylariaceae	Xylariales	Sordariomycetes	Ascomycota	algae	Qingdao	--	--
AS54	Moesziomyces	aphidis	Ustilaginaceae	Ustilaginales	Ustilaginomycetes	Basidiomycota	algae	Qingdao	--	--
AS44	Nectria	sp.	Nectriaceae	Hypocreales	Sordariomycetes	Ascomycota	algae	Qingdao	--	--
AS25	Cladosporium	ramotenellum	Cladosporiaceae	Capnodiales	Dothideomycetes	Ascomycota	algae	Qingdao	--	--
AS59	Microascus	murinus	Microascaceae	Microascales	Sordariomycetes	Ascomycota	algae	Qingdao	--	--
AS7	Amphichorda	cavernicola	Cordycipitaceae	Hypocreales	Sordariomycetes	Ascomycota	algae	Qingdao	Amphichorda cavernicola CGMCC 3.19571/2022.10.02	GTGGCTTCGAGTTTCTACTCCATACCTTTGTGAACATACCTATCGTTGCTTCGGCGGGTCCGTCCCGGAGCTGGCAGTGCACGGCCAGCCCCGGAACCAGACGCCCGCCGAGGACCCCAAACTCTTGTTTTTATAGTGGATCTTCTGAGTCTTATACAAAATAAATTAAAACTTTCAGCAACGGATCTCTTGGTTCTGGCATCGATGAAGAACGCAGCGAAATGCGATAAGTAATGTGAATTGCAGAATTCAGTGAATCATCGAATCTTTGAACGCACATTGCGCCCGCCAGTACTCTGGCGGGCATGCCTGTCCGAGCGTCATTTCAACCCTCAGGGCCCGTCCGCGGGACCTGGCGTTGGGGATCGGCTGCCCCTGGCGGCTGCCGGCCCTGAAATA…	98.024%	NR_172819.1
AS52	Alternaria	alstroemeriae	Pleosporaceae	Pleosporales	Dothideomycetes	Ascomycota	algae	Qingdao	Alternaria alstroemeriae CBS 118809 /2022.10.03	TGGACCTCTCGGGGTTACAGCCTTGCTGAATTATTCACCCTTGTCTTTTGCGTACTTCTTGTTTCCTTGGTGGGTTCGCCCACCACTAGGACAAACATAAACCTTTTGTAATTGCAATCAGCGTCAGTAACAAATTAATAATTACAACTTTCAACAACGGATCTCTTGGTTCTGGCATCGATGAAGAACGCAGCGAAATGCGATAAGTAGTGTGAATTGCAGAATTCAGTGAATCATCGAATCTTTGAACGCACATTGCGCCCTTTGGTATTCCAAAGGGCATGCCTGTTCGAGCGTCATTTGTACCCTCAAGCTTTGCTTGGTGTTGGGCGTCTTGTCTCTAGCTTTGCTGGAGACTCGCCTTAAAGTAATTGGCAGCCGGCCTACTGGTTTCGGAGC…	99.608%	NR_163686.1
AS53	Pseudonectria	foliicola	Nectriaceae	Hypocreales	Sordariomycetes	Ascomycota	algae	Qingdao	Pseudonectria foliicola/2022.10.02	TTGGGCATCGAGTTCACTCACCAACCCCTGTGAACATACCTCTTGTTGCCTCGGCGGGACCGCCCCGGCGCCTTCGGGCTGCCGGACCCAGGCGCCCGCCGGAGGACCATCAAACTCTTGTATTTTATTTCAGGAATCTTCTGAGTATACAAAACAAATGAATCAAAACTTTCAACAACGGATCTCTTGGTTCTGGCATCGATGAAGAACGCAGCGAAATGCGATAAGTAATGTGAATTGCAGAATTCAGTGAACCATCGAATCTTTGAACGCACATTGCGCCCGCCAGTATTCTGGCGGGCATGCCTGTCCGAGCGTCATTTCAACCCTCAAGCCCCTTTGGGCTTGGTGTTGGGGATCGGCCCGCCCCGTGCGGCGCCGGCCCCGAAATCTAGTGGC…	99.625%	NR_164229.1
AS38	Lophiostoma	sp.	Lophiostomataceae	Pleosporales	Dothideomycetes	Ascomycota	algae	Qingdao	--	--
AS42	Mucor	circinelloides	Mucoraceae	Mucorales	Mucoromycetes	Mucoromycota	algae	Qingdao	Mucor circinelloides CBS 195.68 /2022.10.02	GCTGGCTACTATCATAATTTTGGCTTGTCCATTATTATCTATTTACTGTGAAATGTATTATTACTTGACGCTTGAGGGATGCTCCACTGCTATAAGGATAGGCGGTGGGGATGCTAACCGAGTCATAATCAAGCTTAGGCTTGGTATCCTATTATTATTTACCAAAAGAATTCAGAATTAATATTGTAACATAGACCTAAAAAATCTATAAAACAACTTTTAACAACGGATCTCTTGGTTCTCGCATCGATGAAGAACGTAGCAAAGTGCGATAACTAATGTGAATTGCATATTCAGTGAATCATCGAGTCTTTGAACGCAACTTGCGCTCATTGGTATTCCAATGAGCACGCCTGTTTCAGTATCAAAACAAACCCTCTATCCAACATTTTGTTGAAT…	97.851%	NR_126116.1
AS21	Chaetomium	madrasense	Chaetomiaceae	Sordariales	Sordariomycetes	Ascomycota	algae	Qingdao	Chaetomium madrasense CBS 315.74 /2022.10.02	GTGGGCTTCGAGATGCAAACTCCCTAACCATTGTGAACGTTACCTAAACCGTTGCTTCGGCGGGCGGCCCCGGGGTCATCCCCGGGCGCCCCTGGGCCCCATCGCGGGCGCCCGCCGGAGGTCACCAAACTCTTGATAATTTATGGCCTCTCTGAGTCTTCTGTACTGAATAAGTCAAAACTTTCAACAACGGATCTCTTGGTTCTGGCATCGATGAAGAACGCAGCGAAATGCGATAAGTAATGTGAATTGCAGAATTCAGTGAATCATCGAATCTTTGAACGCACATTGCGCCCGCCAGTATTCTGGCGGGCATGCCTGTTCGAGCGTCATTTCAACCATCAAGCCCCCGGCTTGTGTTGGGGACCTGCGGCTGCCGCAGGCCCTGAAAAGCAGTGG…	99.263%	NR_144834.1
AS48	Penicillium	viticola	Aspergillaceae	Eurotiales	Eurotiomycetes	Ascomycota	algae	Qingdao	Penicillium viticola JCM 17636 /2022.10.02	ACCTGCGGAAGGATCATTACTGAGTGAGGGCCCTCTGGGTCCAACCTCCCACCCGTGTTTATTTGTACCT TGTTGCTTCGGCAGGCCCGCCTCACGGCCGCCGGGGGGCTTCTGCCCCCGGGCCCGCGCCTGCCGGAGAC AATCTTGAACGCTGTCTGAAGAATGCAGTCTGAGCGATTAGCAAAATTAGTTAAAACTTTCAACAACGGA TCTCTTGGTTCCGGCATCGATGAAGAACGCAGCGAAATGCGATAATTAATGTGAATTGCAGAATTCAGTG AATCATCGAGTCTTTGAACGCACATTGCGCCCCCTGGTATTCCGGGGGGCATGCCTGTCCGAGCGTCATT GCTGCCCTCAAGCCCGGCTTGTGTGTTGGGCCCTGTTCCCCCGG…	99.82%	NR_121209.1
AS8	Chrysosporium	keratinophilum	Onygenaceae	Onygenales	Eurotiomycetes	Ascomycota	algae	Qingdao	Chrysosporium keratinophilum FM 55159 /2022.10.02	CTTCCGTAGGTGAACCTGCGGAAGGATCATTAAAGTGTTTCGGAGCCTGGCTCGGGCACCTCAACTCGAGGTGTCGGTGC CAGCGCCCCCACACGTGTTTACTCAACTTGGTTGCCTTGGTGAGCCTGCCCTTGTGGCTGCCGGGGATGCCTCACGGCGT CCTGGGCTCGTGCTCACCAGTGGAACATTTGAACTCTTATGTGAAAATAGTCAGTCTGAGCATTATGCAAATTAAATAAA ACTTTCAACAACGGATCTCTTGGTTCCGGCATCGATGAAGAACGCAGCGAAATGCGATAAGTAATGTGAATTGCAGAATT CCGTGAATCATCGAATCTTTGAACGCACATTGCGCCCTCTGGTATTCCGGGGGGCATGCCTGTTCGAGCGTCATT…	97.015%	NR_165936.1
AS32	Sarocladium	kiliense	Nectriaceae	Hypocreales	Sordariomycetes	Ascomycota	algae	Qingdao	Sarocladium kiliense MUCL 9724 /2022.10.02	GCTGGCATCGAGTGCTAGGCTCTCCACCCATTGTGAACATACCTATCGTTCCCTCGGCGGGCTCAGCGCGCGGTGCCTCCGGGCTCCGGGCGTCCGCCGGGGACAACCAAACTCTGATTTTATTGTGAATCTCTGAGGGGCGAAAGCCCGAAAACAAAATGAATCAAAACTTTCAACAACGGATCTCTTGGCTCTGGCATCGATGAAGAACGCAGCGAAATGCGATAAGTAATGTGAATTGCAGAATTCAGTGAATCATCGAATCTTTGAACGCACATTGCGCCCGCCGGCACTCCGGCGGGCATGCCTGTCCGAGCGTCATTTCAACCCTCAGGACCCCCTTTCGGGGGGGACCTGGTGCTGGGGATCAGCGGCCTCCGGGCCCCTGTCCCCCAAATT…	99.413%	NR_130684.1
AS33	Lecanicillium	coprophilum	Cordycipitaceae	Hypocreales	Sordariomycetes	Ascomycota	algae	Qingdao	Lecanicillium coprophilum CGMCC 3.18986 /2022.10.02	GTTGGCCTCGACTCACTCCCAACCCATGTGAACATACCTTACAGTTGCTTCGGCGGAGCCGCCCCGGCGCCCGGAACCCAGTTTCGCGGCCCGGACCAAGGCGCCCGCCGGAGGCCACAAACTCTTCTGTTTTTACAGTATCTTCTGAGTGTGCCGCAAGGCAAAAACAAATGAATCAAAACTTTCAACAACGGATCTCTTGGTTCTGGCATCGATGAAGAACGCAGCGAAATGCGATAAGTAATGTGAATTGCAGAATTCAGTGAATCATCGAATCTTTGAACGCACATTGCGCCCGCCAGAATTCTGGCGGGCATGCCTGTTCGAGCGTCATTTCAACCCTCGGTCTCCCTCCGGGAGAGACCGGCGTTGGGGACCGGCACTTACCCCGCCGGCCCC…	99.811%	NR_163303.1
AS24	Cladosporium	endophyticum	Cladosporiaceae	Capnodiales	Dothideomycetes	Ascomycota	algae	Qingdao	Cladosporium endophyticum MFLUCC 17-0599 /2022.10.02	AGGTTGAACCGGTCTCGGGCCGGGAGTTCACAACCCTTTGTTGTCCGACTCTGTTGCCTCCGGGGCGACCCTGCCTCCGGGCGGGGGCCCCGGGTGGACATTTCAAACTCTTGCGTAACTTTGCAGTCTGAGTAAATTTAATTAATAAATTAAAACTTTCAACAACGGATCTCTTGGTTCTGGCATCGATGAAGAACGCAGCGAAATGCGATAAGTAATGTGAATTGCAGAATTCAGTGAATCATCGAATCTTTGAACGCACATTGCGCCCCCTGGTATTCCGGGGGGCATGCCTGTTCGAGCGTCATTTCACCACTCAAGCCTCGCTTGGTATTGGGCGACGCGGTCCGCCGCGCGCCTCAAATCGACCGGCTGGGTCTTTCGTCCCCTCAGCGTTGT…	98.276%	NR_158360.1
AS47	Penicillium	sumatraense	Aspergillaceae	Eurotiales	Eurotiomycetes	Ascomycota	algae	Qingdao	--	--
AS17	Aspergillus	welwitschiae	Aspergillaceae	Eurotiales	Eurotiomycetes	Ascomycota	algae	Qingdao	Aspergillus welwitschiae CBS 139.54/2022.10.02	GTTCGAAAGGCGGGGTCTTTGGGCCACCTCCCATCCGTGTCTATTGTACCCTGTTGCTTCGGCGGGCCCGCCGCTTGTCG GCCGCCGGGGGGGCGCCTCTGCCCCCCGGGCCCGTGCCCGCCGGAGACCCCAACACGAACACTGTCTGAAAGCGTGCAGT CTGAGTTGATTGAATGCAATCAGTTAAAACTTTCAACAATGGATCTCTTGGTTCCGGCATCGATGAAGAACGCAGCGAAA TGCGATAACTAATGTGAATTGCAGAATTCAGTGAATCATCGAGTCTTTGAACGCACATTGCGCCCCCTGGTATTCCGGGG GGCATGCCTGTCCGAGCGTCATTGCTGCCCTCAAGCCCGGCTTGTGTGTTGGGTCGCCGTCCCCCTCTCCGGGGG…	0.9946	NR_137513.1
AS65	Trichoderma	scalesiae	Hypocreaceae	Hypocreales	Sordariomycetes	Ascomycota	algae	Qingdao	Trichoderma scalesiae CBS 120069/2022.10.02	AGAAGTTGGGGGTTTAAACTTCCAAACCCAATGTGAACCATACCAAACTGTTGCCTCGGCGGGGTCACGCCCCGGGTGCG TCGCAGCCCCGGAACCAGGCGCCCGCCGGAGGGACCAACCAAACTCTTTTCTGTAGTCCCCTCGCGGACGTTATTTCTTA CAGCTCTGAGCAAAAATTCAAAATGAATCAAAACTTTCAACAACGGATCTCTTGGTTCTGGCATCGATGAAGAACGCAGC GAAATGCGATAAGTAATGTGAATTGCAGAATTCAGTGAATCATCGAATCTTTGAACGCACATTGCGCCCGCCAGTATTCT GGCGGGCATGCCTGTCCGAGCGTCATTTCAACCCTCGAACCCCTCCGGGGGGTCGGCGTTGGGGACCTCGGGAGC…	0.9946	NR_144876.1
AS61	Microascus	atrogriseus	Microascaceae	Microascales	Sordariomycetes	Ascomycota	algae	Qingdao	Microascus atrogriseus CBS 295.52 /2022.10.02	TTGACTTTTCCGGTCTCCGTTGGTGACCAGCGGAGGGATCATTATCGAAGTTACTCTTCATACCCATTTGTGAACACTACCCCATTGCCGCGCGTTGCCTCGGCGGTGAGGTCCGCGGGGGGGACGGGCTGCGCTCCGGCGCTTGCCCCCCCCCTCCCCGGGCCCCCGCCGGCCGCGCCTTACTCTTAATTTGCAAAGCGGACTGTACGATCTGATTAATCTTGATAAACAAGTCAAAACTTTCAACAACGGATCTCTTGGTTCTGGCATCGATGAAGAACGCAGCGAAATGCGATAAGTAATGTGAATTGCAGAATTCAGTGAATCATCGAATCTTTGAACGCACATTGCGCCCGGCAGCAATCTGCCGGGCATGCCTGTCCGAGCGTCATTTCTCCC…	97.565%	NR_155415.1
AS16	Aspergillus	jensenii	Aspergillaceae	Eurotiales	Eurotiomycetes	Ascomycota	algae	Qingdao	Aspergillus jensenii NRRL 58600 /2022.10.02	TAAGGAGTGCGGGCTGCCTCCGGGCGCCCAACCTCCCACCCGTGACTACCTAACACTGTTGCTTCGGCGGGGAGCCCTCTCGGGGGCGAGCCGCCGGGGACTACTGAACTTCATGCCTGAGAGTGATGCAGTCTGAGTCTGAATATAAAATCAGTCAAAACTTTCAACAATGGATCTCTTGGTTCCGGCATCGATGAAGAACGCAGCGAACTGCGATAAGTAATGTGAATTGCAGAATTCAGTGAATCATCGAGTCTTTGAACGCACATTGCGCCCCCTGGCATTCCGGGGGGCATGCCTGTCCGAGCGTCATTGCTGCCCATCAAGCCCGGCTTGTGTGTTGGGTCGTCGTCCCCCCCGGGGGACGGGCCCGAAAGGCAGCGGCGGCACCGTGTCCGG…	99.814%	NR_135444.1
AS12	Aspergillus	hortai	Aspergillaceae	Eurotiales	Eurotiomycetes	Ascomycota	algae	Qingdao	--	--
AS63	Stachybotrys	chartarum	Stachybotryaceae	Hypocreales	Sordariomycetes	Ascomycota	algae	Qingdao	Stachybotrys chartarum CBS 182.80 /2022.10.02	CCGGCTTCGAGCTTCACTCCCAACCCTTATGTGAACCGTACCTATCGTTGCTTCGGCGGGAACGCCCCGGCGCCCTGCGCCCGGATCCAGGCGCCCGCCGGAGACCCCAAACTCTTGTGTTTTTTTCAGTATTCTCTGAGTGGCAAACGCAAAAATAAATCAAAACTTTTAACAACGGATCTCTTGGCTCTGGCATCGATGAAGAACGCAGCGAAATGCGATAAGTAATGTGAATTGCAGAATTCAGTGAATCATCGAATCTTTGAACGCACATTGCGCCCGTTAGCATTCTAGCGGGCATGCCTGTCCGAGCGTCATTTCAACCCTCAGGGTCCCCGTTCCGGCGGGGAACCTGGTGTTGGGGATCGGCCCGCCCCGTGCGGCGCCGTCCCCCAAATT…	98.72%	NR_145083.1
AS27	Cladosporium	colombiae	Cladosporiaceae	Capnodiales	Dothideomycetes	Ascomycota	algae	Qingdao	Cladosporium colombiae CBS 274.80B/2022.10.02	TAAGTGACCCGGTCTACCACCGGGATGTTCATAACCCTTTGTTGTCCGACTCTGTTGCCTCCGGGGCGACCCTGCCTTCG GGCGGGGGCTCCGGGTGGACACTTCAAACTCTTGCGTAACTTTGCAGTCTGAGTAAACTTAATTAATAAATTAAAACTTT TAACAACGGATCTCTTGGTTCTGGCATCGATGAAGAACGCAGCGAAATGCGATAAGTAATGTGAATTGCAGAATTCAGTG AATCATCGAATCTTTGAACGCACATTGCGCCCCCTGGTATTCCGGGGGGCATGCCTGTTCGAGCGTCATTTCACCACTCA AGCCTCGCTTGGTATTGGGCATCGCGGTCCGCCGCGTGCCTCAAATCGACCGGCTGGGTCTTCTGTCCCCTAAGC…	0.9941	NR_119729.1
AS26	Cladosporium	colombiae	Cladosporiaceae	Capnodiales	Dothideomycetes	Ascomycota	algae	Qingdao	Cladosporium colombiae CBS 274.80B /2022.10.02	TAGTGACCCGGTCTACCACCGGGATGTTCATAACCCTTTGTTGTCCGACTCTGTTGCCTCCGGGGCGACCCTGCCTTCGG GCGGGGGCTCCGGGTGGACACTTCAAACTCTTGCGTAACTTTGCAGTCTGAGTAAACTTAATTAATAAATTAAAACTTTT AACAACGGATCTCTTGGTTCTGGCATCGATGAAGAACGCAGCGAAATGCGATAAGTAATGTGAATTGCAGAATTCAGTGA ATCATCGAATCTTTGAACGCACATTGCGCCCCCTGGTATTCCGGGGGGCATGCCTGTTCGAGCGTCATTTCACCACTCAA GCCTCGCTTGGTATTGGGCAACGCGGTCCGCCGCGTGCCTCAAATCGACCGGCTGGGTCTTCTGTCCCCTAAGCG…	0.9922	NR_119729.1
AS15	Aspergillus	candidus	Aspergillaceae	Eurotiales	Eurotiomycetes	Ascomycota	algae	Qingdao	Aspergillus candidus ATCC 1002 /2022.10.02	TTACCGAGTGAGGCTTTCTCTGAGCCCAACCTCCCACCCGTGTATACCGTACCCTGTTGCTTCGGCGGGCCCGCCTCACGGCCGCCGGGGGACCTCGCGTCCCCGGGCCCGCGCCCGCCGAAGACCCCAACACGAACACTGTCTGAAAAGTGCAGTCTGAGTCGATTGTTACCAATCAGTCAAAACTTTCAACAATGGATCTCTTGGTTCCGGCATCGATGAAGAACGCAGCGAAATGCGATAACTAATGTGAATTGCAGAATTCAGTGAATCATCGAGTCTTTGAACGCACATTGCGCCCCCTGGTATTCCGGGGGGCATGCCTGTCCGAGCGTCATTGCTGCCCTCAAGCACGGCTTGTGTGTTGGGCCCCGTCCCCGGTACCCCCGGGGACGGGCC…	99.472%	NR_077149.1
AS62	Sarocladium	terricola	Cordycipitaceae	Hypocreales	Sordariomycetes	Ascomycota	algae	Qingdao	Sarocladium terricola CBS 243.59/2022.10.02	TGGGGTTCTGGGGCTCTTTGGCTCTCCACCCACTGTGAACATACCTACGTTTCCCTCGGCGGGCTCAGCGCGTTGCGGTT CTGCCGCCTCGCGTCCGCCGGGGGCACCCAAACTCGAATTTATATCGTGTATCTCTGAGGGGCGAAAGCCCGTAAAACAA ATGAATCAAAACTTTCAACAACGGATCTCTTGGCTCTGGCATCGATGAAGAACGCAGCGAAATGCGATAAGTAATGTGAA TTGCAGAATTCAGTGAATCATCGAATCTTTGAACGCACATTGCGCCCGCCGGCACTCCGGCGGGCATGCCTGTCCGAGCG TCATTTCAACCCTCGGGCCCACCCCTCGCGGGGAACGGGCCCGGCGTTGGGGACCGGAGGCCGCCCCGGCGGCAC…	1	NR_176703.1
AS4	Alternaria	compacta	Pleosporaceae	Pleosporales	Dothideomycetes	Ascomycota	algae	Qingdao	--	--
AS14	Aspergillus	sp.	Aspergillaceae	Eurotiales	Eurotiomycetes	Ascomycota	algae	Qingdao	--	--
AS6	Alternaria	tenuissima	Pleosporaceae	Pleosporales	Dothideomycetes	Ascomycota	algae	Qingdao	--	--
AS55	Purpureocillium	lilacinum	Ophiocordycipitaceae	Hypocreales	Sordariomycetes	Ascomycota	algae	Qingdao	Purpureocillium lilacinum NRRL 895/2022.10.02	GATTGGAAACAACACTCCCAAACCCACTGTGAACCTTACCTCAGTTGCCTCGGCGGGAACGCCCCGGCCGCCGGCCCCCG CGCCGGCGCCGGACCCAGGCGCCCGCCGCAGGGACCCCAAACTCTCTTGCATTACGCCCAGCGGGCGGAATTTCTTCTCT GAGTTGCACAAGCAAAAACAAATGAATCAAAACTTTCAACAACGGATCTCTTGGTTCTGGCATCGATGAAGAACGCAGCG AAATGCGATAAGTAATGTGAATTGCAGAATTCAGTGAATCATCGAATCTTTGAACGCACATTGCGCCCGCCAGCATTCTG GCGGGCATGCCTGTTCGAGCGTCATTTCAACCCTCGAGCCCCCCCGGGGGCCTCGGTGTTGGGGGACGGCACACC…	0.9981	NR_165946.1
AS40	Microascus	trigonosporus	Microascaceae	Microascales	Sordariomycetes	Ascomycota	algae	Qingdao	--	--
AS57	Penicillium	chrysogenum	Aspergillaceae	Eurotiales	Eurotiomycetes	Ascomycota	algae	Qingdao	Penicillium chrysogenum CBS 306.48/2022.10.02	GGGGTCGGAGTGAGGCTCTGGGTCACCTCCCACCCGTGTTTATTTTACCTTGTTGCTTCGGCGGGCCCGCCTTAACTGGC CGCCGGGGGGCTTACGCCCCCGGGCCCGCGCCCGCCGAAGACACCCTCGAACTCTGTCTGAAGATTGTAGTCTGAGTGAA AATATAAATTATTTAAAACTTTCAACAACGGATCTCTTGGTTCCGGCATCGATGAAGAACGCAGCGAAATGCGATACGTA ATGTGAATTGCAAATTCAGTGAATCATCGAGTCTTTGAACGCACATTGCGCCCCCTGGTATTCCGGGGGGCATGCCTGTC CGAGCGTCATTGCTGCCCTCAAGCACGGCTTGTGTGTTGGGCCCCGTCCTCCGATCCCGGGGGACGGGCCCGAAA…	0.9892	NR_077145.1
AS35	Aspergillus	ruber	Aspergillaceae	Eurotiales	Eurotiomycetes	Ascomycota	algae	Qingdao	--	--
AS23	Cladosporium	colombiae	Cladosporiaceae	Capnodiales	Dothideomycetes	Ascomycota	algae	Qingdao	Cladosporium colombiae CBS 274.80B/2022.10.02	GGAGTTCGGTGACCCGGTCTTACCACCGGGATGTTCATAACCCTTTGTTGTCCGACTCTGTTGCCTCCGGGGCGACCCTG CCTTCGGGCGGGGGCTCCGGGTGGACACTTCAAACTCTTGCGTAACTTTGCAGTCTGAGTAAACTTAATTAATAAATTAA AACTTTTAACAACGGATCTCTTGGTTCTGGCATCGATGAAGAACGCAGCGAAATGCGATAAGTAATGTGAATTGCAGAAT TCAGTGAATCATCGAATCTTTGAACGCACATTGCGCCCCCTGGTATTCCGGGGGGCATGCCTGTTCGAGCGTCATTTCAC CACTCAAGCCTCGCTTGGTATTGGGCAACGCGGTCCGCCGCGTGCCTCAAATCGACCGGCTGGGTCTTCTGTCCC…	0.998	NR_119729.1
AS3	Alternaria	alstroemeriae	Pleosporaceae	Pleosporales	Dothideomycetes	Ascomycota	algae	Qingdao	Alternaria alstroemeriae CBS 118809/2022.10.02	GGGCTTCAATATGAGGCGGGCTGGACCTCTCGGGGTTACAGCCTTGCTGAATTATTCACCCTTGTCTTTTGCGTACTTCT TGTTTCCTTGGTGGGTTCGCCCACCACTAGGACAAACATAAACCTTTTGTAATTGCAATCAGCGTCAGTAACAAATTAAT AATTACAACTTTCAACAACGGATCTCTTGGTTCTGGCATCGATGAAGAACGCAGCGAAATGCGATAAGTAGTGTGAATTG CAGAATTCAGTGAATCATCGAATCTTTGAACGCACATTGCGCCCTTTGGTATTCCAAAGGGCATGCCTGTTCGAGCGTCA TTTGTACCCTCAAGCTTTGCTTGGTGTTGGGCGTCTTGTCTCTAGCTTTGCTGGAGACTCGCCTTAAAGTAATTG…	0.9943	NR_163686.1
AS58	Microascus	croci	Microascaceae	Microascales	Sordariomycetes	Ascomycota	algae	Qingdao	Microascus croci CBS 158.44 /2022.10.02	TTGGGCTTACGGAAGTTACTCTTCATACCCATTTGTGAACACTACCCCATTGCCGCGCGTTGCCTCGGCGGTGAGGTCTGCGGTGGGGCCGCGCTCCGGCGCTCCCCACCCCGGGCCCCCGCCGGCCGCGCCGAACTCTTAATTTGCAAAGCGGACTGTACGTTCTGATTAATCTTGAAAAAAACAAGTCAAAACTTTCAACAACGGATCTCTTGGTTCTGGCATCGATGAAGAACGCAGCGAAATGCGATAAGTAATGTGAATTGCAGAATTCAGTGAATCATCGAATCTTTGAACGCACATTGCGCCCGGCAGCAATCTGCCGGGCATGCCTGTCCGAGCGTCATTTCTTCCCTCGAGCGCGGTTCGGTCCCTAGGGGCCTGCCGCCGCCCGGTGTT…	98.787%	NR_132941.1
AS67	Trichoderma	yunnanense	Hypocreaceae	Hypocreales	Sordariomycetes	Ascomycota	algae	Qingdao	Trichoderma yunnanense CBS 121219 /2022.10.02	TGTGAACGTTACCAAACTGTTGCCTCGGCGGGGTCACGCCCCGGGTGCGTCGCAGCCCCGGAACCAGGCGCCCGCCGGAG GAACCAACCAAACTCTTTCTGTAGTCCCCTCGCGGACGTATTTCTTACAGCTCTGAGCAAAAATTCAAAATGAATCAAAA CTTTCAACAACGGATCTCTTGGTTCTGGCATCGATGAAGAACGCAGCGAAATGCGATAAGTAATGTGAATTGCAGAATTC AGTGAATCATCGAATCTTTGAACGCACATTGCGCCCGCCAGTATTCTGGCGGGCATGCCTGTCCGAGCGTCATTTCAACC CTCGAACCCCTCCGGGGGATCGGCGTTGGGGATCGGGACCCCTCACACGGGTGCCGGCCCCGAAATACAGTGGCG…	100%	NR_134419.1
AS30	Neodevriesia	metrosideri	Neodevriesiaceae	Capnodiales	Dothideomycetes	Ascomycota	algae	Qingdao	Neodevriesia metrosideri /2022.10.02	GTGGCTACCGAGTGAGCGCTCGCGCGCCCGACCTCCCAACCCTTTGATTTGATCAAGACCTCCTTCTGCCTCGGGGGCGACCCGGACCTCGGCCCGCGGTCCCCCCGGTGGTCACCAACCAAAACTCTGCATCAATTGTCGTCTGAGTATTGAGTAAATTCAATCAAAACTTTCAACAACGGATCTCTTGGTTCTGGCATCGATGAAGAACGCAGCGAAATGCGATAAGTAATGTGAATTGCAGAATTCAGTGAATCATCGAATCTTTGAACGCACATTGCGCCCTTTGGCATTCCGAAGGGCATGCCTGTTCGAGCGTCATTACACCAATCAAGCCTGGCTTGGTATTGGGCGACGGGGCCGTGACACGCCCCGCGCCCCAATGACTCCGGCGGGACG…	97.11%	NR_161141.1
AS50	Knufia	hypolithi	Vibrisseaceae	Helotiales	Leotiomycetes	Ascomycota	algae	Qingdao	Knufia hypolithi CBS 146991 /2022.10.02	TTGGGGTACCGAGTAGGGTTTGCCTCTCCCGGCGCCCGACCTCCCAACCCTTTGTCTACTATACCTTGTCGTTGCTTCGGCGGACCGGTCTTGACCCCCTCGGGGGCCTCGACCGCCGGGGTCCATCCCTGGAGAGCGTCCGCCGACGGCCCAACCACAAAACTCTTGTACCAAACCATGTCGTCTGAATTATTCTTGATTAAAATCAAAAACAAAACTTTCAACAACGGATCTCTTGGTTCTGGCATCGATGAAGAACGCAGCGAAATGCGATAAGTAATGCGAATTGCAGAATTTCCGTGAGTCATCGAATCTTTGAACGCACATTGCGCCCACTGGTATTCCGGTGGGCATGCCTGTTCGAGCGTCATTATCCTCCCTCAAACCTCGGGTTTGGTG…	98.299%	NR_173045.1
AS60	Scopulariopsis	sp.	Microascaceae	Microascales	Sordariomycetes	Ascomycota	algae	Qingdao	--	--
AS39	Paralulworthia	posidoniae	Lulworthiaceae	Lulworthiales	Sordariomycetes	Ascomycota	algae	Qingdao	Paralulworthia posidoniae MUT 5261 /2022.10.02	CCCTTCTGTGAaCCTCTTGAACGTTGCCTCGGCGGGCTCGCCCGCCGACGGCCCACCCAACAAACCATCACCAGACGTAC CTCTGAGTGGACAACACAAATAAGTCAAAACTTTCAGCAACGGATCTCTTGGCTCTGGCATCGATGAAGAACGCAGCGAA ATGCGATACGTAATGTGAATTGCAGAATTCAGCGAATCATCGAATCTTTGAACGCACATTGCGCCTGCCGGTATTCCGGC GGGCATGCCTGTCCGAGCGTCATTAAAAACCCCTCGGGCCCCACCTCTTGCGGGGTAGGCCCGGCGTTGGGGCGCCGGCG GACCTCGCGGTCTCCCGGGCCCTCAAATCCAGCGGCGGACGCCTCCACCGAGCCTCCCAGCGCAGTAACTCACTC…	99.799%	NR_169704.1
AS1	Acremonium	sp.	unspecified	Hypocreales	Sordariomycetes	Ascomycota	algae	Qingdao	Acremonium citrinum CBS 384.96 /2022.10.02	AAATTTTAAGCAGTATGCACTCAGGCCTTTGTGAACATACCACTGTTGCTTCGGCGGCGTTCCTGGTGTCTCCGGGCGCCCAGGCTCGCACGCGCCGCCGAGGGTACCAAACTCTTGCTTTTATAGCGGACTTCTGAGTACAAAACATAAATGAATTAAAACTTTCAGCAACGGATCTCTTGGCTCTGGCATCGATGAAGAACGCAGCGAAATGCGATAAGTAATGTGAATTGCAGAATTCAGTGAATCATCGAATCTTTGAACGCACATTGCGCCCACCAGTATTCTGGTGGGCATGCCTGTCCGAGCGTCATTTCAACCCTCAGGCCCGGCCTGGTGTTGGGGATTGGCCCTTCGCGGCCAGCCCCGAAATGCAGTGGCGGCCCTCCGCAACTCCTC…	95.04%	NR_154670.1
AS154	Aspergillus	tubingensis	Aspergillaceae	Eurotiales	Eurotiomycetes	Ascomycota	sediment	Qingdao	Aspergillus tubingensis NRRL 4875/2022.10.02	GGCTTCCGAGGTTCGGGGTCTTTGGGCAACCTCCCATCCGTGTCTATTATACCCTGTTGCTTCGGCGGGCCCGCCGCTTG TCGGCCGCCGGGGGGGCGCCTTTGCCCCCCGGGCCCGTGCCCGCCGGAGACCCCAACACGAACACTGTCTGAAAGCGTGC AGTCTGAGTTGATTGAATGCAATCAGTTAAAACTTTCAACAATGGATCTCTTGGTTCCGGCATCGATGAAGAACGCAGCG AAATGCGATAACTAATGTGAATTGCAGAATTCAGTGAATCATCGAGTCTTTGAACGCACATTGCGCCCCCTGGTATTCCG GGGGGCATGCCTGTCCGAGCGTCATTGCTGCCCTCAAGCCCGGCTTGTGTGTTGGGTCGCCGTCCCCCTCTCCGG…	0.9946	NR_131293.1
AS155	Aspergillus	austwickii	Aspergillaceae	Eurotiales	Eurotiomycetes	Ascomycota	sediment	Qingdao	Aspergillus austwickii DTO 228-F7/2022.10.02	GGCTCGAGTGTAGGGTTCCTAGCGAGCCCAACCTCCCACCCGTGTTTACTGTACCTTAGTTGCTTCGGCGGGCCCGCCATTCATGGCCGCCGGGGGCTCTCAGCCCCGGGCCCGCGCCCGCCGGAGACACCACGAACTCTGTCTGATCTAGTGAAGTCTGAGTTGATTGTATCGCAATCAGTTAAAACTTTCAACAATGGATCTCTTGGTTCCGGCATCGATGAAGAACGCAGCGAAATGCGATAACTAGTGTGAATTGCAGAATTCCGTGAATCATCGAGTCTTTGAACGCACATTGCGCCCCCTGGTATTCCGGGGGGCATGCCTGTCCGAGCGTCATTGCTGCCCATCAAGCACGGCTTGTGTGTTGGGTCGTCGTCCCCTCTCCGGGGGGGACGG…	99.819%	NR_171607.1
AS156	Acremonium	sp.	unspecified	Hypocreales	Sordariomycetes	Ascomycota	sediment	Qingdao	--	--
AS157	Aspergillus	tubingensis	Aspergillaceae	Eurotiales	Eurotiomycetes	Ascomycota	sediment	Qingdao	Aspergillus tubingensis NRRL 4875/2022.10.02	GGTTCGGAGTGCGGGTCTTTGGGCCAACCTCCCATCCGTGTCTATTATACCCTGTTGCTTCGGCGGGCCCGCCGCTTGTCGGCCGCCGGGGGGGCGCCTTTGCCCCCCGGGCCCGTGCCCGCCGGAGACCCCAACACGAACACTGTCTGAAAGCGTGCAGTCTGAGTTGATTGAATGCAATCAGTTAAAACTTTCAACAATGGATCTCTTGGTTCCGGCATCGATGAAGAACGCAGCGAAATGCGATAACTAATGTGAATTGCAGAATTCAGTGAATCATCGAGTCTTTGAACGCACATTGCGCCCCCTGGTATTCCGGGGGGCATGCCTGTCCGAGCGTCATTGCTGCCCTCAAGCCCGGCTTGTGTGTGCGGTCGCCGTCCCCCTCTCCGGGGGGAC…	98.936%	NR_131293.1
AS158	Aspergillus	tubingensis	Aspergillaceae	Eurotiales	Eurotiomycetes	Ascomycota	sediment	Qingdao	Aspergillus tubingensis NRRL 4875/2022.10.02	TGGCAACGAGTGCGGGTCTTTGGGCCACCTCCCATCCGTGTCTATTATACCCTGTTGCTTCGGCGGGCCCGCCGCTTGTCGGCCGCCGGGGGGGCGCCTTTGCCCCCCGGGCCCGTGCCCGCCGGAGACCCCAACACGAACACTGTCTGAAAGCGTGCAGTCTGAGTTGATTGAATGCAATCAGTTAAAACTTTCAACAATGGATCTCTTGGTTCCGGCATCGATGAAGAACGCAGCGAAATGCGATAACTAATGTGAATTGCAGAATTCAGTGAATCATCGAGTCTTTGAACGCACATTGCGCCCCCTGGTATTCCGGGGGGCATGCCTGTCCGAGCGTCATTGCTGCCCTCAAGCCCGGCTTGTGTGTGGGGTCGCCGTCCCCCTCTCCGGGGGGAC…	99.282%	NR_131293.1
AS159	Talaromyces	coprophilus	Hypocreaceae	Hypocreales	Sordariomycetes	Ascomycota	sediment	Qingdao	Talaromyces coprophilus FMR 15199 /2022.10.02	AAAGAAGGGGGGGGGGCTCGCGGACACCTCCCACCCTTGTCTCTATACACCTGTTGCTTTGGCGGGCCCACCGGGGCCAC CTGGTCGCCGGGGGACGCACGTCCCCGGGCCCGCGCCCGCCGAAGCGCGCTGTGAACCCTGATGAAGATGGGCTGTCTGA GTACTATGAAAATTGTCAAAACTTTCAACAATGGATCTCTTGGTTCCGGCATCGATGAAGAACGCAGCGAAATGCGATAA GTAATGTGAATTGCAGAATTCCGTGAATCATCGAATCTTTGAACGCACATTGCGCCCCCTGGCATTCCGGGGGGCATGCC TGTCCGAGCGTCATTTCTGCCCTCAAGCACGGCTTGTGTGTTGGGTGTGGTCCCCCCGGGGACCTGCCCGAAAGG…	0.9851	NR_172395.1
AS160	Acremonium	sp.	unspecified	Hypocreales	Sordariomycetes	Ascomycota	sediment	Qingdao	--	--
AS161	Aspergillus	pseudoterreus	Aspergillaceae	Eurotiales	Eurotiomycetes	Ascomycota	sediment	Qingdao	Aspergillus pseudoterreus NRRL 4017/2022.10.02	GGCAACGAGTGCGGGTCTCGTGGCCACCTCCCACCCGTGACTATTGTACCTTGTTGCTTCGGCGGGCCCGCCAGCTTGCTGGCCGCCGGGGGGCGTCTCGCCCCCGGGCCCGTGCCCGCCGGAGACCCCAACATGAACCCTGTTCTGAAAGCTTGCAGTCTGAGTTGTGATTCTTTGCAATCAGTTAAAACTTTCAACAATGGATCTCTTGGTTCCGGCATCGATGAAGAACGCAGCGAAATGCGATAACTAATGTGAATTGCAGAATTCAGTGAATCATCGAGTCTTTGAACGCACATTGCGCCCCCTGGTATTCCGGGGGGCATGCCTGTCCGAGCGTCATTGCTGCCCTCAAGCCCGGCTTGTGTGTTGGGTCCTCGTCCCCCGGCTCCCGGGGGA…	98.057%	NR_137472.1
AS162	Aspergillus	sp.	Aspergillaceae	Eurotiales	Eurotiomycetes	Ascomycota	sediment	Qingdao	--	--
AS163	Aspergillus	pseudoterreus	Aspergillaceae	Eurotiales	Eurotiomycetes	Ascomycota	sediment	Qingdao	Aspergillus pseudoterreus NRRL 4017/2022.10.02	GGCAACGAGTGCGGGTCTCGTGGCCACCTCCCACCCGTGACTATTGTACCTTGTTGCTTCGGCGGGCCCGCCAGCTTGCTGGCCGCCGGGGGGCGTCTCGCCCCCGGGCCCGTGCCCGCCGGAGACCCCAACATGAACCCTGTTCTGAAAGCTTGCAGTCTGAGTTGTGATTCTTTGCAATCAGTTAAAACTTTCAACAATGGATCTCTTGGTTCCGGCATCGATGAAGAACGCAGCGAAATGCGATAACTAATGTGAATTGCAGAATTCAGTGAATCATCGAGTCTTTGAACGCACATTGCGCCCCCTGGTATTCCGGGGGGCATGCCTGTCCGAGCGTCATTGCTGCCCTCAAGCCCGGCTTGTGTGTTGGGTCCTCGTCCCCCGGCTCCCGGGGGA…	98.057%	NR_137472.1
AS164	Penicillium	polonicum	Aspergillaceae	Eurotiales	Eurotiomycetes	Ascomycota	sediment	Qingdao	Penicillium polonicum CBS 222.28 /2022.10.02	GGGGCTCGAAGTGAGGGCTTTGGGTCACCTCCCACCCGTGTTTATTTTACCTTGTTGCTTCGGCGGGCCCGCCTTTACTG GCCGCCGGGGGGCTCACGCCCCCGGGCCCGCGCCCGCCGAAGACACCCCCGAACTCTGTCTGAAGATTGAAGTCTGAGTG AAAATATAAATTATTTAAAACTTTCAACAACGGATCTCTTGGTTCCGGCATCGATGAAGAACGCAGCGAAATGCGATACG TAATGTGAATTGCAAATTCAGTGAATCATCGAGTCTTTGAACGCACATTGCGCCCCCTGGTATTCCGGGGGGCATGCCTG TCCGAGCGTCATTGCTGCCCTCAAGCCCGGCTTGTGTGTTGGGCCCCGTCCTCCGATTCCGGGGGACGGGCCCGA…	0.991	NR_103687.1
AS165	Trichoderma	yunnanense	Hypocreaceae	Hypocreales	Sordariomycetes	Ascomycota	sediment	Qingdao	Trichoderma yunnanense CBS 121219/2022.10.02	GGGGGTTCGGGCTTCACTCCCAACCCAATGTGAACGTTACCAAACTGTTGCCTCGGCGGGGTCACGCCCCGGGTGCGTCG CAGCCCCGGAACCAGGCGCCCGCCGGAGGAACCAACCAAACTCTTTCTGTAGTCCCCTCGCGGACGTATTTCTTACAGCT CTGAGCAAAAATTCAAAATGAATCAAAACTTTCAACAACGGATCTCTTGGTTCTGGCATCGATGAAGAACGCAGCGAAAT GCGATAAGTAATGTGAATTGCAGAATTCAGTGAATCATCGAATCTTTGAACGCACATTGCGCCCGCCAGTATTCTGGCGG GCATGCCTGTCCGAGCGTCATTTCAACCCTCGAACCCCTCCGGGGGATCGGCGTTGGGGATCGGGACCCCTCACA…	0.9982	NR_134419.1
AS166	Fusarium	irregulare	Nectriaceae	Hypocreales	Sordariomycetes	Ascomycota	sediment	Qingdao	Fusarium irregulare CGMCC 3.19489 /2022.10.02	GGGGTCGTGTTTAACTCCCAACCCCTGTGACATACCTATACGTTGCCTCGGCGGATCAGCCCGCGCCCCGTAAAACGGGA CGGCCCGCCCGAGGACCCTAAACTCTGTTTTTAGTGGAACTTCTGAGTAAAACAAACAAATAAATCAAAACTTTCAACAA CGGATCTCTTGGTTCTGGCATCGATGAAGAACGCAGCAAAATGCGATAAGTAATGTGAATTGCAGAATTCAGTGAATCAT CGAATCTTTGAACGCACATTGCGCCCGCCAGTATTCTGGCGGGCATGCCTGTTCGAGCGTCATTTCAACCCTCAAGCTCA GCTTGGTGTTGGGACTCGCGGTAACCCGCGTTCCCCAAATCGATTGGCGGTCACGTCGAGCTTCCATAGCGTAGT…	0.998	NR_164595.1
AS167	Aspergillus	sp.	Aspergillaceae	Eurotiales	Eurotiomycetes	Ascomycota	sediment	Qingdao	--	--
AS168	Aspergillus	tubingensis	Aspergillaceae	Eurotiales	Eurotiomycetes	Ascomycota	sediment	Qingdao	Aspergillus tubingensis NRRL 4875/2022.10.02	GGTTCGGAGTGCGGGTCTTTGGGCCAACCTCCCATCCGTGTCTATTATACCCTGTTGCTTCGGCGGGCCCGCCGCTTGTCGGCCGCCGGGGGGGCGCCTTTGCCCCCCGGGCCCGTGCCCGCCGGAGACCCCAACACGAACACTGTCTGAAAGCGTGCAGTCTGAGTTGATTGAATGCAATCAGTTAAAACTTTCAACAATGGATCTCTTGGTTCCGGCATCGATGAAGAACGCAGCGAAATGCGATAACTAATGTGAATTGCAGAATTCAGTGAATCATCGAGTCTTTGAACGCACATTGCGCCCCCTGGTATTCCGGGGGGCATGCCTGTCCGAGCGTCATTGCTGCCCTCAAGCCCGGCTTGTGTGTGCGGTCGCCGTCCCCCTCTCCGGGGGGAC…	98.936%	NR_131293.1
AS169	Aspergillus	austwickii	Aspergillaceae	Eurotiales	Eurotiomycetes	Ascomycota	sediment	Qingdao	Aspergillus austwickii DTO 228-F7/2022.10.02	GGCTCGAGTGTAGGGTTCCTAGCGAGCCCAACCTCCCACCCGTGTTTACTGTACCTTAGTTGCTTCGGCGGGCCCGCCATTCATGGCCGCCGGGGGCTCTCAGCCCCGGGCCCGCGCCCGCCGGAGACACCACGAACTCTGTCTGATCTAGTGAAGTCTGAGTTGATTGTATCGCAATCAGTTAAAACTTTCAACAATGGATCTCTTGGTTCCGGCATCGATGAAGAACGCAGCGAAATGCGATAACTAGTGTGAATTGCAGAATTCCGTGAATCATCGAGTCTTTGAACGCACATTGCGCCCCCTGGTATTCCGGGGGGCATGCCTGTCCGAGCGTCATTGCTGCCCATCAAGCACGGCTTGTGTGTTGGGTCGTCGTCCCCTCTCCGGGGGGGACGG…	99.819%	NR_171607.1
AS170	Cladosporium	sp.	Cladosporiaceae	Capnodiales	Dothideomycetes	Ascomycota	sediment	Qingdao	--	--
AS171	Cladosporium	sp.	Cladosporiaceae	Capnodiales	Dothideomycetes	Ascomycota	sediment	Qingdao	--	--
AS172	Aspergillus	pseudoterreus	Aspergillaceae	Eurotiales	Eurotiomycetes	Ascomycota	sediment	Qingdao	Aspergillus pseudoterreus NRRL 4017/2022.10.02	GGTATCGAGTGCGGGTCTCGTGGCCAACCTCCCACCCGTGACTATTGTACCTTGTTGCTTCGGCGGGCCCGCCAGCTTGCTGGCCGCCGGGGGGCGTCTCGCCCCCGGGCCCGTGCCCGCCGGAGACCCCAACATGAACCCTGTTCTGAAAGCTTGCAGTCTGAGTTGTGATTCTTTGCAATCAGTTAAAACTTTCAACAATGGATCTCTTGGTTCCGGCATCGATGAAGAACGCAGCGAAATGCGATAACTAATGTGAATTGCAGAATTCAGTGAATCATCGAGTCTTTGAACGCACATTGCGCCCCCTGGTATTCCGGGGGGCATGCCTGTCCGAGCGTCATTGCTGCCCTCAAGCCCGGCTTGTGTGTTGGGTCCTCGTCCCCCGGCTCCCGGGGG…	97.927%	NR_137472.1
AS173	Aspergillus	austwickii	Aspergillaceae	Eurotiales	Eurotiomycetes	Ascomycota	sediment	Qingdao	Aspergillus austwickii DTO 228-F7/2022.10.02	GGCTCGAGTGTAGGGTTCCTAGCGAGCCCAACCTCCCACCCGTGTTTACTGTACCTTAGTTGCTTCGGCGGGCCCGCCATTCATGGCCGCCGGGGGCTCTCAGCCCCGGGCCCGCGCCCGCCGGAGACACCACGAACTCTGTCTGATCTAGTGAAGTCTGAGTTGATTGTATCGCAATCAGTTAAAACTTTCAACAATGGATCTCTTGGTTCCGGCATCGATGAAGAACGCAGCGAAATGCGATAACTAGTGTGAATTGCAGAATTCCGTGAATCATCGAGTCTTTGAACGCACATTGCGCCCCCTGGTATTCCGGGGGGCATGCCTGTCCGAGCGTCATTGCTGCCCATCAAGCACGGCTTGTGTGTTGGGTCGTCGTCCCCTCTCCGGGGGGGACGG…	99.819%	NR_171607.1
AS174	Aspergillus	pseudoterreus	Aspergillaceae	Eurotiales	Eurotiomycetes	Ascomycota	sediment	Qingdao	Aspergillus pseudoterreus NRRL 4017/2022.10.02	GGTATCGAGTGCGGGTCTCGTGGCCAACCTCCCACCCGTGACTATTGTACCTTGTTGCTTCGGCGGGCCCGCCAGCTTGCTGGCCGCCGGGGGGCGTCTCGCCCCCGGGCCCGTGCCCGCCGGAGACCCCAACATGAACCCTGTTCTGAAAGCTTGCAGTCTGAGTTGTGATTCTTTGCAATCAGTTAAAACTTTCAACAATGGATCTCTTGGTTCCGGCATCGATGAAGAACGCAGCGAAATGCGATAACTAATGTGAATTGCAGAATTCAGTGAATCATCGAGTCTTTGAACGCACATTGCGCCCCCTGGTATTCCGGGGGGCATGCCTGTCCGAGCGTCATTGCTGCCCTCAAGCCCGGCTTGTGTGTTGGGTCCTCGTCCCCCGGCTCCCGGGGG…	97.927%	NR_137472.1
AS175	Aspergillus	welwitschiae	Aspergillaceae	Eurotiales	Eurotiomycetes	Ascomycota	sediment	Qingdao	Aspergillus welwitschiae CBS 139.54 /2022.10.02	GGGTTATGGAGGGCGGGTCTTTGGGCACCTCCCATCCGTGTCTATTGTACCCTGTTGCTTCGGCGGGCCCGCCGCTTGTC GGCCGCCGGGGGGGCGCCTCTGCCCCCCGGGCCCGTGCCCGCCGGAGACCCCAACACGAACACTGTCTGAAAGCGTGCAG TCTGAGTTGATTGAATGCAATCAGTTAAAACTTTCAACAATGGATCTCTTGGTTCCGGCATCGATGAAGAACGCAGCGAA ATGCGATAACTAATGTGAATTGCAGAATTCAGTGAATCATCGAGTCTTTGAACGCACATTGCGCCCCCTGGTATTCCGGG GGGCATGCCTGTCCGAGCGTCATTGCTGCCCTCAAGCCCGGCTTGTGTGTTGGGTCGCCGTCCCCCTCTCCGGGG…	0.991	NR_137513.1
AS176	Aspergillus	tubingensis	Aspergillaceae	Eurotiales	Eurotiomycetes	Ascomycota	sediment	Qingdao	Aspergillus tubingensis NRRL 4875 /2022.10.02	TCAAGAGGGGGGGGGTCTTTGGGCACCTCCCATCCGTGTCTATTATACCCTGTTGCTTCGGCGGGCCCGCCGCTTGTCGG CCGCCGGGGGGGCGCCTTTGCCCCCCGGGCCCGTGCCCGCCGGAGACCCCAACACGAACACTGTCTGAAAGCGTGCAGTC TGAGTTGATTGAATGCAATCAGTTAAAACTTTCAACAATGGATCTCTTGGTTCCGGCATCGATGAAGAACGCAGCGAAAT GCGATAACTAATGTGAATTGCAGAATTCAGTGAATCATCGAGTCTTTGAACGCACATTGCGCCCCCTGGTATTCCGGGGG GCATGCCTGTCCGAGCGTCATTGCTGCCCTCAAGCCCGGCTTGTGTGTTGGGTCGCCGTCCCCCTCTCCGGGGGG…	0.9928	NR_131293.1
AS177	Aspergillus	pseudoterreus	Aspergillaceae	Eurotiales	Eurotiomycetes	Ascomycota	sediment	Qingdao	Aspergillus pseudoterreus NRRL 4017/2022.10.02	GGCAACGAGTGCGGGTCTCGTGGCCACCTCCCACCCGTGACTATTGTACCTTGTTGCTTCGGCGGGCCCGCCAGCTTGCTGGCCGCCGGGGGGCGTCTCGCCCCCGGGCCCGTGCCCGCCGGAGACCCCAACATGAACCCTGTTCTGAAAGCTTGCAGTCTGAGTTGTGATTCTTTGCAATCAGTTAAAACTTTCAACAATGGATCTCTTGGTTCCGGCATCGATGAAGAACGCAGCGAAATGCGATAACTAATGTGAATTGCAGAATTCAGTGAATCATCGAGTCTTTGAACGCACATTGCGCCCCCTGGTATTCCGGGGGGCATGCCTGTCCGAGCGTCATTGCTGCCCTCAAGCCCGGCTTGTGTGTTGGGTCCTCGTCCCCCGGCTCCCGGGGGA…	97.927%	NR_137472.1
AS178	Aspergillus	sp.	Aspergillaceae	Eurotiales	Eurotiomycetes	Ascomycota	sediment	Qingdao	--	--
AS179	Aspergillus	tamarii	Aspergillaceae	Eurotiales	Eurotiomycetes	Ascomycota	sediment	Qingdao	Aspergillus tamarii NRRL 20818/2022.10.02	GTCGTGTGTAGGGTTCTAGCGAGCCCAACCTCCCACCCGTGTTTACTGTAACCTTAGTTGCTTCGGCGGGCCCGCCTTTAAGGCCGCCGGGGGGCATCAGCCCCCGGGCCCGCGCCCGCCGGAGACACCACGAACTCTGTCTGATCTAGTGAAGTCTGAGTTGATTGTATCGCAATCAGTTAAAACTTTCAACAATGGATCTCTTGGTTCCGGCATCGATGAAGAACGCAGCGAAATGCGATAACTAGTGTGAATTGCAGAATTCCGTGAATCATCGAGTCTTTGAACGCACATTGCGCCCCCTGGTATTCCGGGGGGCATGCCTGTCCGAGCGTCATTGCTGCCCATCAAGCACGGCTTGTGTGTTGGGTCGTCGTCCCCTCTTCGGGGGGGACGGGC…	99.64%	NR_135325.1
AS180	Aspergillus	welwitschiae	Aspergillaceae	Eurotiales	Eurotiomycetes	Ascomycota	sediment	Qingdao	Aspergillus welwitschiae CBS 139.54 /2022.10.02	GGGGTACGAATCGGGTCTTTGGGCCAACCTCCCATCCGTGTCTATTGTACCCTGTTGCTTCGGCGGGCCCGCCGCTTGTC GGCCGCCGGGGGGGCGCCTCTGCCCCCCGGGCCCGTGCCCGCCGGAGACCCCAACACGAACACTGTCTGAAAGCGTGCAG TCTGAGTTGATTGAATGCAATCAGTTAAAACTTTCAACAATGGATCTCTTGGTTCCGGCATCGATGAAGAACGCAGCGAA ATGCGATAACTAATGTGAATTGCAGAATTCAGTGAATCATCGAGTCTTTGAACGCACATTGCGCCCCCTGGTATTCCGGG GGGCATGCCTGTCCGAGCGTCATTGCTGCCCTCAAGCCCGGCTTGTGTGTTGGGTCGCCGTCCCCCTCTCCGGGG…	0.9964	NR_137513.1
AS181	Aspergillus	pseudoterreus	Aspergillaceae	Eurotiales	Eurotiomycetes	Ascomycota	sediment	Qingdao	Aspergillus pseudoterreus NRRL 4017/2022.10.02	GGTATCGAGTGCGGGTCTCGTGGCCAACCTCCCACCCGTGACTATTGTACCTTGTTGCTTCGGCGGGCCCGCCAGCTTGCTGGCCGCCGGGGGGCGTCTCGCCCCCGGGCCCGTGCCCGCCGGAGACCCCAACATGAACCCTGTTCTGAAAGCTTGCAGTCTGAGTTGTGATTCTTTGCAATCAGTTAAAACTTTCAACAATGGATCTCTTGGTTCCGGCATCGATGAAGAACGCAGCGAAATGCGATAACTAATGTGAATTGCAGAATTCAGTGAATCATCGAGTCTTTGAACGCACATTGCGCCCCCTGGTATTCCGGGGGGCATGCCTGTCCGAGCGTCATTGCTGCCCTCAAGCCCGGCTTGTGTGTTGGGTCCTCGTCCCCCGGCTCCCGGGGG…	97.927%	NR_137472.1
AS49	Pestalotiopsis	papuana	Sporocadaceae	Xylariales	Sordariomycetes	Ascomycota	sediment	Qingdao	--	--
AS66	Trichoderma	sp.	Hypocreaceae	Hypocreales	Sordariomycetes	Ascomycota	sediment	Qingdao	--	--
AS46	Penicillium	rubens	Aspergillaceae	Eurotiales	Eurotiomycetes	Ascomycota	sediment	Qingdao	--	--
AS64	Trichoderma	harzianum	Hypocreaceae	Hypocreales	Sordariomycetes	Ascomycota	sediment	Qingdao	--	--
AS2	Acrostalagmus	luteoalbus	Plectosphaerellaceae	Glomerellales	Sordariomycetes	Ascomycota	sediment	Qingdao	--	--
AS69	Verticillium	sp.	Plectosphaerellaceae	Glomerellales	Sordariomycetes	Ascomycota	sediment	Qingdao	--	--
AS148	Acremonium	persicinum	unspecified	Hypocreales	Sordariomycetes	Ascomycota	sediment	Qingdao	--	--
AS144	Acremonium	egyptiacum	unspecified	Hypocreales	Sordariomycetes	Ascomycota	sediment	Qingdao	Acremonium egyptiacum CBS 114785 /2022.10.02	GAAGAAGAGGTAAACTCCAAACCATTGTGAACCTACCACTGTTGCTTCGGCGGCCTCGCCCCGGGCGCGTTCGCGCGGCC CGGACCCAGGCGTCCGCCGGAGGCTCCAAACTCTTGTCTTTTAGTGTATTTCTGAGTGGCATAAGCAAATAAATCAAAAC TTTCAGCAACGGATCTCTTGGTTCTGGCATCGATGAAGAACGCAGCAAAATGCGATAAGTAATGTGAATTGCAGAATTCA GTGAATCATCGAATCTTTGAACGCACATTGCGCCCGCCAGTATTCTGGCGGGCATGCCTGTCTGAGCGTCATTTCAACCC TCAGGACCCGTTCGCGGGACCTGGCGTTGGGGATCAGCCTGCCCCTGGCGGCGGCTGGCCCTGAAATCCAGTGGC…	0.996	NR_163807.1
AS139	Aspergillus	viridinutans	Aspergillaceae	Eurotiales	Eurotiomycetes	Ascomycota	sediment	Qingdao	--	--
AS87	Pestalotiopsis	sp.	Sporocadaceae	Xylariales	Sordariomycetes	Ascomycota	sediment	Qingdao	--	--
AS142	Fusarium	solani	Nectriaceae	Hypocreales	Sordariomycetes	Ascomycota	sediment	Qingdao	--	--
AS99	Fusarium	verticillioides	Nectriaceae	Hypocreales	Sordariomycetes	Ascomycota	sediment	Qingdao	--	--
AS138	Verticillium	sp.	Plectosphaerellaceae	Glomerellales	Sordariomycetes	Ascomycota	sediment	Qingdao	--	--
AS75	Wardomyces	simplex	unspecified	Microascales	Sordariomycetes	Ascomycota	sediment	Qingdao	--	--
AS74	Ascotricha	sp.	Xylariaceae	Xylariales	Sordariomycetes	Ascomycota	sediment	Qingdao	--	--
AS98	Hyphozyma	variabilis	Pseudeurotiaceae	Thelebolales	Leotiomycetes	Ascomycota	sediment	Qingdao	--	--
AS100	Humicola	sp.	Chaetomiaceae	Sordariales	Sordariomycetes	Ascomycota	sediment	Qingdao	--	--
AS101	Emericellopsis	pusilla	unspecified	Hypocreales	Sordariomycetes	Ascomycota	sediment	Qingdao	Emericellopsis pusilla CBS 226.62/2022.10.02	CGGCGTCAGTACACCACTCCAAACCCCTGTGAACATACCTATGTTGCTTCGGCGGGTCGTCCCGCGGCGCGCCCTCGTGG CGTGACCCGGACCCAGGCGCCCGCCGGGGAACCAAACTCTTGTCTTCCAGTGTCTCCTCTGAGTGGCATAAGCAAAAATA AACAAAACTTTCAGCAACGGATCTCTTGGTTCTGGCATCGATGAAGAACGCAGCGAAATGCGATAAGTAATGTGAATTGC AGAATTCAGTGAATCATCGAATCTTTGAACGCACATTGCGCCCGCCAGTATTCTGGCGGGCATGCCTGTCTGAGCGTCAT TTCAACCCTCAGCCCCCGTTCGCGGGGCGCTGGCGTTGGGGCCCGGCCGTCCTCGCGGCGGCCGTCCCCGAAACA…	0.9814	NR_159878.1
AS132	Veronaea	musae	Herpotrichiellaceae	Chaetothyriales	Eurotiomycetes	Ascomycota	sediment	Qingdao	--	--
AS102	Engyodontium	album	Cordycipitaceae	Hypocreales	Sordariomycetes	Ascomycota	sediment	Qingdao	--	--
AS103	Corollospora	maritima	Halosphaeriaceae	Microascales	Sordariomycetes	Ascomycota	sediment	Qingdao	--	--
AS135	Chrysosporium	merdarium	unspecified	Onygenales	Eurotiomycetes	Ascomycota	sediment	Qingdao	--	--
AS104	Doratomyces	stemonitis	unspecified	Microascales	Sordariomycetes	Ascomycota	sediment	Qingdao	--	--
AS105	Pseudallescheria	ellipsoidea	Sporormiaceae	Pleosporales	Dothideomycetes	Ascomycota	sediment	Qingdao	Pseudallescheria ellipsoidea CBS 418.73/2022.10.02	GGGGTTTTGGGTTCTACTCCAAACCCATTGTGAACCTTACCTATGTTCTGTTGCCTCGGCGGCGTGGTCAGCGCCCCCTC TGAAAAGAGGACGATGCCCTCCCGCCGGCAGCACCAAACTCTTGAATTTTACAGCGGATTACAGTTCTGATTTGAAAAGA AAAAACAAGTTAAAACTTTCAACAACGGATCTCTTGGTTCTGGCATCGATGAAGAACGCAGCGAAATGCGATAAGTAATG TGAATTGCAGAATTCAGTGAATCATCGAATCTTTGAACGCACATTGCGCCCGGCAGTAATCTGCCGGGCATGCCTGTCCG AGCGTCATTTCAACCCTCGAACCTCCGTTTCCTCAGGGAAGCTCAGGGTCGGTGTTGGGGCGCTACGGCGAGTCT…	0.9906	NR_130665.1
AS106	Aphanoascus	sp.	Onygenaceae	Onygenales	Eurotiomycetes	Ascomycota	sediment	Qingdao	--	--
AS107	Cladosporium	domesticum	Leptosphaeriaceae	Pleosporales	Dothideomycetes	Ascomycota	sediment	Qingdao	Cladosporium domesticum CPC 22307/2022.10.02	ATGGTATAACCCTTTGTTGTCCGACTCTGTTGCCTCCGGGGCGACCCTGCCTTCGGGCGGGGGCCCCGGGTGGACACTTC AAACTCTTGCGTAACTTTGCAGTCTGAGTAAATTTAATTAATAAATTAAAACTTTCAACAACGGATCTCTTGGTTCTGGC ATCGATGAAGAACGCAGCGAAATGCGATAAGTAATGTGAATTGCAGAATTCAGTGAATCATCGAATCTTTGAACGCACAT TGCGCCCCCTGGTATTCCGGGGGGCATGCCTGTTCGAGCGTCATTTCACCACTCAAGCCTCGCTTGGTATTGGGCGACGC GGTCCGCCGCGCGCCTCAAATCGACCGGCTGGGTCTTCTGTCCCCTCAGCGTTGTGGAAACTATTCGCTAAAGGG…	0.9938	NR_156348.1
AS108	Stachybotrys	chartarum	Stachybotryaceae	Hypocreales	Sordariomycetes	Ascomycota	sediment	Qingdao	Stachybotrys chartarum CBS 182.80/2022.10.02	GAGCCTCCGGGTTAACTCCCAACCCTTATGTGACCGTACCTATCGTTGCTTCGGCGGGAACGCCCCGGCGCCCTGCGCCC GGATCCAGGCGCCCGCCGGAGACCCCAAACTCTTGTGTTTTTTTCAGTATTCTCTGAGTGGCAAACGCAAAAATAAATCA AAACTTTTAACAACGGATCTCTTGGCTCTGGCATCGATGAAGAACGCAGCGAAATGCGATAAGTAATGTGAATTGCAGAA TTCAGTGAATCATCGAATCTTTGAACGCACATTGCGCCCGTTAGCATTCTAGCGGGCATGCCTGTCCGAGCGTCATTTCA ACCCTCAGGGTCCCCGTTCCGGCGGGGAACCTGGTGTTGGGGATCGGCCCGCCCCGTGCGGCGCCGTCCCCCAAA…	0.9926	NR_145083.1
AS150	Mucor	circinelloides	Mucoraceae	Mucorales	Mucoromycetes	Mucoromycota	sediment	Qingdao	Mucor circinelloides CBS 195.68 /2022.10.02	CTTATATCAATAATTTTGGCTTGTCCATTATTATCTATTTACTGTGAACTGTATTATTACTTGACGCTTGAGGGATGCTC CACTGCTATAAGGATAGGCGATGGAGATGTTAACCGAGTCATAGTCAAGCTTAGGCTTGGTATCCTATTATTATTTACCA AAAGAATTCAGAATTAATATTGTAACATAGACCTAAAAAATCTATAAAACAACTTTTAACAACGGATCTCTTGGTTCTCG CATCGATGAAGAACGTAGCAAAGTGCGATAACTAGTGTGAATTGCATATTCAGTGAATCATCGAGTCTTTGAACGCAACT TGCGCTCATTGGTATTCCAATGAGCACGCCTGTTTCAGTATCAAAACAAACCCTCTATCCAACATTTTGTTGAAT…	0.9835	NR_126116.1
AS109	Cladosporium	colombiae	Cladosporiaceae	Capnodiales	Dothideomycetes	Ascomycota	sediment	Qingdao	Cladosporium colombiae CBS 274.80B/2022.10.02	TTAATTGACCCGGTCTACCACCGGGATGTTCATAACCCTTTGTTGTCCGACTCTGTTGCCTCCGGGGCGACCCTGCCTTC GGGCGGGGGCTCCGGGTGGACACTTCAAACTCTTGCGTAACTTTGCAGTCTGAGTAAACTTAATTAATAAATTAAAACTT TTAACAACGGATCTCTTGGTTCTGGCATCGATGAAGAACGCAGCGAAATGCGATAAGTAATGTGAATTGCAGAATTCAGT GAATCATCGAATCTTTGAACGCACATTGCGCCCCCTGGTATTCCGGGGGGCATGCCTGTTCGAGCGTCATTTCACCACTC AAGCCTCGCTTGGTATTGGGCAACGCGGTCCGCCGCGTGCCTCAAATCGACCGGCTGGGTCTTCTGTCCCCTAAG…	0.9941	NR_119729.1
AS136	Acrostalagmus	luteoalbus	Plectosphaerellaceae	Glomerellales	Sordariomycetes	Ascomycota	sediment	Qingdao	--	--
AS85	Acremonium	potronii	unspecified	Hypocreales	Sordariomycetes	Ascomycota	sediment	Qingdao	--	--
AS94	Alternaria	alternata	Pleosporaceae	Pleosporales	Dothideomycetes	Ascomycota	sediment	Qingdao	--	--
AS129	Penicillium	simplicissimum	Aspergillaceae	Eurotiales	Eurotiomycetes	Ascomycota	sediment	Qingdao	--	--
AS96	Alternaria	compacta	Pleosporaceae	Pleosporales	Dothideomycetes	Ascomycota	sediment	Qingdao	--	--
AS137	Geotrichum	candidum	Dipodascaceae	Saccharomycetales	Saccharomycetes	Ascomycota	sediment	Qingdao	--	--
AS84	Simplicillium	sp.	Cordycipitaceae	Hypocreales	Sordariomycetes	Ascomycota	sediment	Qingdao	--	--
AS110	Purpureocillium	lilacinum	Ophiocordycipitaceae	Hypocreales	Sordariomycetes	Ascomycota	sediment	Qingdao	--	--
AS88	Diaporthe	endophytica	Diaporthaceae	Diaporthales	Sordariomycetes	Ascomycota	sediment	Qingdao	--	--
AS147	Talaromyces	stipitatus	Trichocomaceae	Eurotiales	Eurotiomycetes	Ascomycota	sediment	Qingdao	--	--
AS131	Aspergillus	tennesseensis	Aspergillaceae	Eurotiales	Eurotiomycetes	Ascomycota	sediment	Qingdao	Aspergillus tennesseensis NRRL 13150/2022.10.02	TAAGAAGTGCGGGGGCTGCCTCCGGGCGCCCAACCTCCCACCCGTGACTACCTAACACTGTTGCTTCGGCGGGGAGCCCT CTCGGGGGCGAGCCGCCGGGGACTACTGAACTTCATGCCTGAGAGTGATGCAGTCTGAGTCTGAATATAAAATCAGTCAA AACTTTCAACAATGGATCTCTTGGTTCCGGCATCGATGAAGAACGCAGCGAACTGCGATAAGTAATGTGAATTGCAGAAT TCAGTGAATCATCGAGTCTTTGAACGCACATTGCGCCCCCTGGCATTCCGGGGGGCATGCCTGTCCGAGCGTCATTGCTG CCCATCAAGCCCGGCTTGTGTGTTGGGTCGTCGTCCCCCCCGGGGGACGGGCCCGAAAGGCAGCGGCGGCACCGT…	0.9981	NR_135447.1
AS146	Talaromyces	funiculosus	Trichocomaceae	Eurotiales	Eurotiomycetes	Ascomycota	sediment	Qingdao	--	--
AS141	Pseudeurotium	bakeri	Pseudeurotiaceae	Thelebolales	Leotiomycetes	Ascomycota	sediment	Qingdao	Pseudeurotium bakeri CBS 878.71/2022.10.02	GGGTTAAGGAAGTTGACTTCGGGGTATACCTCCCACCCTTTGTTTATTATACCTTTGTTGCTTTGGCGGGCCCGTCCTCG GACCACCGGCTTCGGCTGGTCAGCGCCCGCCAGAGGACCTAAAACTCTGTTTGTTCATATTGTCTGAGTACTATATAATA GTTAAAACTTTCAACAACGGATCTCTTGGTTCTGGCATCGATGAAGAACGCAGCGAAATGCGATAAGTAATGTGAATTGC AGAATTCAGTGAATCATCGAATCTTTGAACGCACATTGCGCCCCCTGGTATTCCGGGGGGCATGCCTGTTCGAGCGTCAT TACAACCCTCAAGCTCTGCTTGGTATTGGGCTCTGCCGGTCCCGGCAGGCCTTAAAATCAGTGGCGGTGCCATTC…	0.9881	NR_145345.1
AS134	Pseudeurotium	bakeri	Pseudeurotiaceae	Thelebolales	Leotiomycetes	Ascomycota	sediment	Qingdao	--	--
AS140	Pseudogymnoascus	destructans	Pseudeurotiaceae	Thelebolales	Leotiomycetes	Ascomycota	sediment	Qingdao	Pseudogymnoascus destructans ATCC MYA-4855/2022.10.02	AGTTCGAAAGTCATCCGGGTTGCCGCAAGGCCTCCCGGGTAACCTACCACCCTTTGTTTATTACACTTTGTTGCTTTGGC AGGCCTGCCCTCGGGCTGCTGGCTCCGGCCGGCGAGCGTCTGCCAGAGGACCTAAACTCTGTTTGTCTATAATGTCTGAG TACTATATAATAGTTAAAACTTTCAACAACGGATCTCTTGGTTCTGGCATCGATGAAGAACGCAGCGAAATGCGATAAGT AATGTGAATTGCAGAATTCAGTGAATCATCGAATCTTTGAACGCACATTGCGCCCCCTGGTATTCCGGGGGGCATGCCTG TCCGAGCGTCATTACAACCCTCAAGCTCAGCTTGGTGTTGGGCCCCGCCGCCCCGGCGGGCCCTAAAGTCAGTGG…	0.9805	NR_111838.1
AS111	Phaeosphaeria	spartinae	Phaeosphaeriaceae	Pleosporales	Dothideomycetes	Ascomycota	sediment	Qingdao	--	--
AS112	Chaetomium	madrasense	Chaetomiaceae	Sordariales	Sordariomycetes	Ascomycota	sediment	Qingdao	--	--
AS91	Exophiala	xenobiotica	Herpotrichiellaceae	Chaetothyriales	Eurotiomycetes	Ascomycota	sediment	Qingdao	--	--
AS113	Geotrichum	sp.	Dipodascaceae	Saccharomycetales	Saccharomycetes	Ascomycota	sediment	Qingdao	Geotrichum candidum isolate CeFu 3/2022.10.02	TAATTGGAAATATTTGTGAATTACCACAGCAAACAATAATCATACAATCAAAACAAAAATAATCAAAACTTTTAACAAGG GATCTCTGGGTCCTCGTATCGATGAAAAACGCAGCGAAACGCATAATTTCTTGGGAATTGCAAAAGGGAATCATCAGTTT TTGAACGCACATTGCACTTTGGGGTATCCCCCAAAGAATACTGGTTTGAGCGTGGTTTCTCTCTGGAAATTGCATTGTTT TTCTAAAATTTCAAATCAAATTCGTTTGAAAAACAACACTATTCAACCTCAAATCAAGAAGGATTACCCGCTGAACTTAA GCATATCAATAACCGGAGAAA	0.952	OM397072.1
AS114	Emericellopsis	microspora	unspecified	Hypocreales	Sordariomycetes	Ascomycota	sediment	Qingdao	--	--
AS115	Emericellopsis	glabra	unspecified	Hypocreales	Sordariomycetes	Ascomycota	sediment	Qingdao	--	--
AS116	Microsphaeropsis	arundinis	unspecified	Pleosporales	Dothideomycetes	Ascomycota	sediment	Qingdao	--	--
AS127	Talaromyces	assiutensis	Trichocomaceae	Eurotiales	Eurotiomycetes	Ascomycota	sediment	Qingdao	--	--
AS117	Chaetomium	subaffine	Chaetomiaceae	Onygenales	Eurotiomycetes	Ascomycota	sediment	Qingdao	Chaetomium subaffine CBS 637.91/2022.10.02	TGGGTTTGAATTGCAAACTCCCTAAACCATTGTGACGTTACCTAAACCGTTGCTTCGGCGGGCGGCCCCGGGGTTTACCC CCCGGGCGCCCCTGGGCCCCACCGCGGGCGCCCGCCGGAGGTCACCAAACTCTTGATAATTTATGGCCTCTCTGAGTCTT CTGTACTGAATAAGTCAAAACTTTCAACAACGGATCTCTTGGTTCTGGCATCGATGAAGAACGCAGCGAAATGCGATAAG TAATGTGAATTGCAGAATTCAGTGAATCATCGAATCTTTGAACGCACATTGCGCCCGCCAGTATTCTGGCGGGCATGCCT GTTCGAGCGTCATTTCAACCATCAAGCCCCGGGCTTGTGTTGGGGACCTGCGGCTGCCGCAGGCCCTGAAAAGCA…	0.9945	NR_144825.1
AS118	Pseudeurotium	sp.	Pseudeurotiaceae	Thelebolales	Leotiomycetes	Ascomycota	sediment	Qingdao	--	--
AS151	Pseudeurotium	sp.	Pseudeurotiaceae	Thelebolales	Leotiomycetes	Ascomycota	sediment	Qingdao	--	--
AS149	Talaromyces	helices	Trichocomaceae	Eurotiales	Eurotiomycetes	Ascomycota	sediment	Qingdao	--	--
AS119	Aspergillus	tubingensis	Aspergillaceae	Eurotiales	Eurotiomycetes	Ascomycota	sediment	Qingdao	Aspergillus tubingensis NRRL 4875/2022.10.02	GCCAGGCAGGTGGGGGCCCTTTGGGGCCCACCTCCCATCCGTGTCTATTATACCCTGTTGCTTCGGCGGGCCCGCCGCTT GTCGGCCGCCGGGGGGGCGCCTTTGCCCCCCGGGCCCGTGCCCGCCGGAGACCCCAACACGAACACTGTCTGAAAGCGTG CAGTCTGAGTTGATTGAATGCAATCAGTTAAAACTTTCAACAATGGATCTCTTGGTTCCGGCATCGATGAAGAACGCAGC GAAATGCGATAACTAATGTGAATTGCAGAATTCAGTGAATCATCGAGTCTTTGAACGCACATTGCGCCCCCTGGTATTCC GGGGGGCATGCCTGTCCGAGCGTCATTGCTGCCCTCAAGCCCGGCTTGTGTGTTGGGTCGCCGTCCCCCTCTCCG…	0.9929	NR_131293.1
AS120	Aspergillus	tabacinus	Aspergillaceae	Eurotiales	Eurotiomycetes	Ascomycota	sediment	Qingdao	--	--
AS145	Chrysosporium	lobatum	unspecified	Onygenales	Eurotiomycetes	Ascomycota	sediment	Qingdao	--	--
AS130	Talaromyces	flavus	Trichocomaceae	Eurotiales	Eurotiomycetes	Ascomycota	sediment	Qingdao	--	--
AS121	Emericella	nidulans	Aspergillaceae	Eurotiales	Eurotiomycetes	Ascomycota	sediment	Qingdao	--	--
AS128	Scopulariopsis	brevicaulis	Microascaceae	Microascales	Sordariomycetes	Ascomycota	sediment	Qingdao	--	--
AS81	Acremonium	sclerotigenum	unspecified	Hypocreales	Sordariomycetes	Ascomycota	sediment	Qingdao	--	--
AS73	Acremonium	cellulolyticus	unspecified	Hypocreales	Sordariomycetes	Ascomycota	sediment	Qingdao	--	--
AS122	Talaromyces	verruculosus	Trichocomaceae	Eurotiales	Eurotiomycetes	Ascomycota	sediment	Qingdao	--	--
AS123	Aspergillus	varians	Aspergillaceae	Eurotiales	Eurotiomycetes	Ascomycota	sediment	Qingdao	Aspergillus varians NRRL 4793/2022.10.02	GGGTACGGACGCGGCTGCCTCCGGGCGCCCAACCTCCCACCCGTGCCTACTTAACACTGTTGCTTCGGCGGGGAGCCCCT AGGGGCGAGCCGCCGGGGACCACCGAACTTCATGCCTGAGAGTAATGCAGTCTGAGTCTGAATGAAAAATCAGTCAAAAC TTTCAACAATGGATCTCTTGGTTCCGGCATCGATGAAGAACGCAGCGAACTGCGATAATTAATGTGAATTGCAGAATTCA GTGAATCATCGAGTCTTTGAACGCACATTGCGCCCCCTGGCATTCCGGGGGGCATGCCTGTCCGAGCGTCATTGCTGCCC TTCAAGCCCGGCTTGTGTGTTGGGTCGTCGTCCCCCCCGGGGGACGGGCCCGAAAGGCAGCGGCGGCACCGTGTC…	1	NR_135362.1
AS133	Fusarium	avenaceum	Nectriaceae	Hypocreales	Sordariomycetes	Ascomycota	sediment	Qingdao	--	--
AS79	Arthrographis	kalrae	Eremomycetaceae	unspecified	Dothideomycetes	Ascomycota	sediment	Qingdao	--	--
AS124	Arthrographis	kalrae	Eremomycetaceae	unspecified	Dothideomycetes	Ascomycota	sediment	Qingdao	--	--
AS90	Alternaria	sp.	Pleosporaceae	Pleosporales	Dothideomycetes	Ascomycota	sediment	Qingdao	--	--
AS126	Gamszarea	sp.	Cordycipitaceae	Hypocreales	Sordariomycetes	Ascomycota	sediment	Qingdao	Gamszarea humicola CGMCC 3.19303 /2022.10.02	CCCATGTGAACATTACCTCTATGTTGCTTCGGCGGAGCCGCCCCGGCGCCCGGAACCCCCTGCGGTCCCGCGGCCCGGAACCAAGGCGCCCGCCGGAGGCCACAAACTCTTCTGTTTTTACAGTTTCTTCTGAGTGTGCCGCAAGGCAGTATACAAATGAGTCAAAACTTTCAACAACGGATCTCTTGGTTCTGGCATCGATGAAGAACGCAGCGAAATGCGATAAGTAATGTGAATTGCAGAATTCAGTGAATCATCGAATCTTTGAACGCACATTGCGCCCGCCAGAATTCTGGCGGGCATGCCTGTTCGAGCGTCATTTCAACCCTCGAGCTCCCCTTTCGGGGGGAGCCCGGCGTTGGGGACCCGGCGCTAACAACGCCGGCCCCGAAATGGAGT…	93.186%	NR_172830.1
AS143	Alternaria	alstroemeriae	Pleosporaceae	Pleosporales	Dothideomycetes	Ascomycota	sediment	Qingdao	Alternaria alstroemeriae CBS 118809 /2022.10.02	TGGACCTCTCGGGGTTACAGCCTTGCTGAATTATTCACCCTTGTCTTTTGCGTACTTCTTGTTTCCTTGGTGGGTTCGCCCACCACTAGGACAAACATAAACCTTTTGTAATTGCAATCAGCGTCAGTAACAAATTAATAATTACAACTTTCAACAACGGATCTCTTGGTTCTGGCATCGATGAAGAACGCAGCGAAATGCGATAAGTAGTGTGAATTGCAGAATTCAGTGAATCATCGAATCTTTGAACGCACATTGCGCCCTTTGGTATTCCAAAGGGCATGCCTGTTCGAGCGTCATTTGTACCCTCAAGCTTTGCTTGGTGTTGGGCGTCTTGTCTCTAGCTTTGCTGGAGACTCGCCTTAAAGTAATTGGCAGCCGGCCTACTGGTTTCGGAGC…	99.608%	NR_163686.1
AS76	Cladosporium	endophyticum	Cladosporiaceae	Capnodiales	Dothideomycetes	Ascomycota	sediment	Qingdao	Cladosporium endophyticum MFLUCC 17-0599 /2022.10.02	CTCGGGCCGGGATGTTCACAACCCTTTGTTGTCCGACTCTGTTGCCTCCGGGGCGACCCTGCCTCCGGGCGGGGGCCCCGGGTGGACATTTCAAACTCTTGCGTAACTTTGCAGTCTGAGTAAATTTAATTAATAAATTAAAACTTTCAACAACGGATCTCTTGGTTCTGGCATCGATGAAGAACGCAGCGAAATGCGATAAGTAATGTGAATTGCAGAATTCAGTGAATCATCGAATCTTTGAACGCACATTGCGCCCCCTGGTATTCCGGGGGGCATGCCTGTCCGAGCGTCATTTCACCACTCAAGCCTCGCTTGGTATTGGGCGACGCGGTCCGCCGCGCGCCTCAAATCGACCGGCTGGGTCTTTCGTCCCCTCAGCGTTGTGGAAACTATTCG…	98.622%	NR_158360.1
AS78	Alternaria	alstroemeriae	Pleosporaceae	Pleosporales	Dothideomycetes	Ascomycota	sediment	Qingdao	Alternaria alstroemeriae CBS 118809 /2022.10.02	TGAAGGCGGGCTGGACCTCTCGGGGTTACAGCCTTGCTGAATTATTCACCCTTGTCTTTTGCGTACTTCTTGTTTCCTTGGTGGGTTCGCCCACCACTAGGACAAACATAAACCTTTTGTAATTGCAATCAGCGTCAGTAACAAATTAATAATTACAACTTTCAACAACGGATCTCTTGGTTCTGGCATCGATGAAGAACGCAGCGAAATGCGATAAGTAGTGTGAATTGCAGAATTCAGTGAATCATCGAATCTTTGAACGCACATTGCGCCCTTTGGTATTCCAAAGGGCATGCCTGTTCGAGCGTCATTTGTACCCTCAAGCTTTGCTTGGTGTTGGGCGTCTTGTCTCTAGCTTTGCTGGAGACTCGCCTTAAAGTAATTGGCAGCCGGCCTACT…	99.615%	NR_163686.1
AS72	Chordomyces	antarcticum	Plectosphaerellaceae	Glomerellales	Sordariomycetes	Ascomycota	sediment	Qingdao	Chordomyces antarcticum CBS 120045 /2022.10.02	CTCGAGTCATACTCTAACCCTTTGTGACCTTTATACCTGTTGCTTCGGCGGCGCGCCCTCCGGGGCGTGCCCGCCGGTATCATCAGAATCTCTGTTTGAACCCGACGATACATCTGAGTGTTCTAAGCGAACTGTTAAAACTTTCAACAACGGATCTCTTGGCTCCAGCATCGATGAAGAACGCAGCGAAACGCGATAAGTAATGTGAATTGCAGAATTCAGTGAATCATCGAATCTTTGAACGCACATGGCGCCTTCCAGTATCCTGGGAGGCATGCCTGTCCGAGCGTCGTTTCAACCCTCGAGCCCCCGTGGCCCGGCGTTGGGGATCTGCCCAGGCAGGCCCCGAAAACCAGTGGCGGACCCGTTACAGGCCCTTCCTTTGCGTAGTAATACTGC…	100%	NR_153879.1
AS80	Hortaea	sp.	unspecified	Dothideales	Dothideomycetes	Ascomycota	sediment	Qingdao	--	--
AS86	Peroneutypa	sp.	Diatrypaceae	Xylariales	Sordariomycetes	Ascomycota	sediment	Qingdao	Peroneutypa rubiformis MFLU 17-1185 /2022.10.02	AGGGGCCTTTTGAGTTTCTACTCCAACCCTTGAGACATACCTAGTTGCCTCGGCGGACTTGCCCTGGGACGACCTACCCTGCAGCGAGTTACCCTGTAACGAGTTGCCCTGTAGGGACCTGCCCTGTAGCCTGCTCGCCGGCGGCCAACCTAAACTCTGTTTTATTGTGGCACTTCTGAGGATTATTCTAAATGAATTAAAACTTTCAACAACGGATCTCTTGGTTCTGGCATCGATGAAGAACGCAGCGAAATGCGATAAGTAATGTGAATTGCAGAATTCAGTGAATCATCGAATCTTTGAACGCACATTGCGCCCATTAGTATTCTAGTGGGCATGCCTGTTCGAGCGTCATTTCAACCATCAAGCCCTATTTGCTTGGCGTTGGGAGACTTGTAG…	95.174%	NR_158867.1
AS89	Robbauera	albescens	Robbaueraceae	Robbauerales	Exobasidiomycetes	Basidiomycota	sediment	Qingdao	Robbauera albescens CBS 608.83 /2022.10.02	TCTGTGGCCCCCAAACCTTCACTTTCCACACACACCTGTGCACCCGGTGGTGGGGGGTTCTTGTAATAGAGCTCCCTCTGCTGCCTATCTATCACATACCCTGAGTATTATGGATGTCAGTGTATACTTGCCTTTTTGGCAGAACTAAACACAACTTGTCGACAACGGATCTCTTGGTTCTCCCATCGATGAAGAACGCAGCGAAATGCGATAAGTAATGTGAATTGCAGAATTCAGTGAATCATCGAATCTTTGAACGCACCTTGCGCTCCTTGGTATTCCGAGGAGCATGCCTGTTTGAGTGTCATGAATCCCTCAAACCCCTCAGGTTTTGAAACAAAAGCCTGGGCTTGGGTTTGGATGTGGGTGCCCTGCCATCTTGTATGGCTCACCCCAAAT…	99.196%	NR_138401.1
AS152	Wallemia	sebi	Wallemiaceae	Wallemiales	Wallemiomycetes	Basidiomycota	sediment	Qingdao	Wallemia sebi CBS 818.96 /2022.10.02	TCATAATCTTCTATTACAAACCACTGTTTTAAAATGTTTACTAGAATGTCCAAGCAGTTAAGCTGTTGAAATTATAAAAGTTTAATAAAACTTTCAGCAACGGATCTCTTGGTTCAGGCATCGATGAAGAACGCAGCGAAATGCGATAAGTAATGTGAATTGCAGATACAGTGAATCATCGAATCTTTGAACGCAAATGGCACTCTATGGTATTCCGTAGAGTACGTCTGTTTGAGCGTCGCGAACATCTCTATAATTAGTTTTTTTTT	99.251%	NR_131988.1
AS92	Aspergillus	sp.	Aspergillaceae	Eurotiales	Eurotiomycetes	Ascomycota	sediment	Qingdao	--	--
AS97	Cladosporium	colombiae	Cladosporiaceae	Capnodiales	Dothideomycetes	Ascomycota	sediment	Qingdao	Cladosporium colombiae CBS 274.80B /2022.10.02	CCGGGATGTTCATAACCCTTTGTTGTCCGACTCTGTTGCCTCCGGGGCGACCCTGCCTTCGGGCGGGGGCTCCGGGTGGACACTTCAAACTCTTGCGTAACTTTGCAGTCTGAGTAAACTTAATTAATAAATTAAAACTTTTAACAACGGATCTCTTGGTTCTGGCATCGATGAAGAACGCAGCGAAATGCGATAAGTAATGTGAATTGCAGAATTCAGTGAATCATCGAATCTTTGAACGCACATTGCGCCCCCTGGTATTCCGGGGGGCATGCCTGTTCGAGCGTCATTTCACCACTCAAGCCTCGCTTGGTATTGGGCATCGCGGTCCGCCGCGTGCCTCAAATCGACCGGCTGGGTCTTCTGTCCCCTAAGCGTTGTGGAAACTATTCGCTAAAG…	99.594%	NR_119729.1
AS83	Talaromyces	wortmannii	Trichocomaceae	Eurotiales	Eurotiomycetes	Ascomycota	sediment	Qingdao	Talaromyces wortmannii CBS 391.48 /2022.10.02	TCCGAGCCCAACCTCCCACCCGTGTTTACCGTTACCGCGTTGCCTCGGCGGGCCCACTGGGGCCTGGCCCCGGTCGCCGGGGGGCTTCTGCCCCCGGGCCCGCGCCCGCCGACGCACCCTAGAACCCTGCCTGAATAGTGAGTCTGAGTGAGATTTGAAATCATTAAAACTTTCAACAACGGATCTCTTGGTTCCGGCATCGATGAAGAACGCAGCGAAATGCGATAAGTAATGTGAATTGCAGAATTCCGTGAATCATCGAATCTTTGAACGCACATTGCGCCCCCTGGCATTCCGGGGGGCATGCCTGTCCGAGCGTCATTTCTGCCCTCCAGCACGGCTGGGTGTTGGGCGCTGTCCCCCCGGGGACACGCCCCAAAAGCAGTGGCGGCGCCGCGT…	98.893%	NR_172039.1
AS153	Cladosporium	subcinereum	Cladosporiaceae	Capnodiales	Dothideomycetes	Ascomycota	sediment	Qingdao	Cladosporium subcinereum UTHSC DI-13-257/2022.10.02	GGGCTTCGGCCTGGTTATTCATAACCCTTTGTTGTCCGACTCTGTTGCCTCCGGGGCGACCCTGCCTTCGGGCGGGGGCTCCGGGTGGACACTTCAAACTCTTGCGTAACTTTGCAGTCTGAGTAAACTTAATTAATAAATTAAAACTTTTAACAACGGATCTCTTGGTTCTGGCATCGATGAAGAACGCAGCGAAATGCGATAAGTAATGTGAATTGCAGAATTCAGTGAATCATCGAATCTTTGAACGCACATTGCGCCCCCTGGTATTCCGGGGGGCATGCCTGTTCGAGCGTCATTTCACCACTCAAGCCTCGCTTGGTATTGGGCAACGCGGTCCGCCGCGTGCCTCAAATCGTCCGGCTGGGTCTTCTGTCCCCTAAGCGTTGTGGAAACTAT…	99.8%	NR_148193.1
AS82	Stachybotrys	chartarum	Stachybotryaceae	Hypocreales	Sordariomycetes	Ascomycota	sediment	Qingdao	Stachybotrys chartarum CBS 182.80 /2022.10.02	GGAGCTTAACTCCCAACCCTTATGTGAACCGTACCTATCGTTGCTTCGGCGGGAACGCCCCGGCGCCCTGCGCCCGGATCCAGGCGCCCGCCGGAGACCCCAAACTCTTGTGTTTTTTTCAGTATTCTCTGAGTGGCAAACGCAAAAATAAATCAAAACTTTTAACAACGGATCTCTTGGCTCTGGCATCGATGAAGAACGCAGCGAAATGCGATAAGTAATGTGAATTGCAGAATTCAGTGAATCATCGAATCTTTGAACGCACATTGCGCCCGTTAGCATTCTAGCGGGCATGCCTGTCCGAGCGTCATTTCAACCCTCAGGGTCCCCGTTCCGGCGGGGAACCTGGTGTTGGGGATCGGCCCGCCCCGCGCGGCGCCGTCCCCCAAATTCAGTGGC…	99.441%	NR_145083.1
AS125	Aspergillus	jensenii	Aspergillaceae	Eurotiales	Eurotiomycetes	Ascomycota	sediment	Qingdao	Aspergillus jensenii NRRL 58600/2022.10.02	GGGTCCGAGTCGGGCTGCCTCCGGGCGCCCAACCTCCCACCCGTGACTACCTAACACTGTTGCTTCGGCGGGGAGCCCTC TCGGGGGCGAGCCGCCGGGGACTACTGAACTTCATGCCTGAGAGTGATGCAGTCTGAGTCTGAATATAAAATCAGTCAAA ACTTTCAACAATGGATCTCTTGGTTCCGGCATCGATGAAGAACGCAGCGAACTGCGATAAGTAATGTGAATTGCAGAATT CAGTGAATCATCGAGTCTTTGAACGCACATTGCGCCCCCTGGCATTCCGGGGGGCATGCCTGTCCGAGCGTCATTGCTGC CCATCAAGCCCGGCTTGTGTGTTGGGTCGTCGTCCCCCCCGGGGGACGGGCCCGAAAGGCAGCGGCGGCACCGTG…	0.9981	NR_135444.1
AS93	Cladosporium	sp.	Cladosporiaceae	Capnodiales	Dothideomycetes	Ascomycota	sediment	Qingdao	--	--
AS95	Chaetomium	spiculipilium	Chaetomiaceae	Sordariales	Sordariomycetes	Ascomycota	sediment	Qingdao	Chaetomium spiculipilium CBS 373.66/2022.10.02	GGGGTTGGGGTGGCAACTCCCTAACCATTGTGAACGTTACCTAAACCGTTGCTTCGGCGGGCGGCCCCGGGGTTTACCCC CCGGGCGCCCCTGGGCCCCACCGCGGGCGCCCGCCGGAGGTCACCAAACTCTTGATAATTTATGGCCTCTCTGAGTCTTC TGTACTGAATAAGTCAAAACTTTCAACAACGGATCTCTTGGTTCTGGCATCGATGAAGAACGCAGCGAAATGCGATAAGT AATGTGAATTGCAGAATTCAGTGAATCATCGAATCTTTGAACGCACATTGCGCCCGCCAGTATTCTGGCGGGCATGCCTG TTCGAGCGTCATTTCAACCATCAAGCCCCCGGCTTGTGTTGGGGACCTGCGGCTGCCGCAGGCCCTGAAAAGCAG…	0.9925	NR_144836.1
AS71	Exophiala	xenobiotica	Herpotrichiellaceae	Chaetothyriales	Eurotiomycetes	Ascomycota	sediment	Qingdao	Exophiala xenobiotica CBS 118157 /2022.10.02	GGGGGCTTTCCGAGTAGGGGCATCCGGGCCCGACCTCCCAACCCTTTGCTTATTATACCTTGTGTTGCTTCGGTAGGTCTGGCTCGTCCTACCGGAGGACCGTAAAACGTCCTCTGGAGAGTGCCTACCGATAGCCCAAACCAAAAACTCTTGAACAAAACATGTCTTGTCTGAGTAAACAAAAAAAATTAAAGCAAAACTTTCAACAACGGATCTCTTGGTTCTGGCATCGATGAAGAACGCAGCGAAATGCGATAAGTAATGCGAATTGCAGAATTCCAGTGAGTCATCGAATCTTTGAACGCACATTGCGCCCTTTGGTATTCCGAAGGGCATGCCTGTTCGAGCGTCATTTTCACCCCTCAAGCCCCCGGCTTGGTGTTGGACGGTTTGGTTTAG…	98.684%	NR_111203.1
AS77	Neodevriesia	metrosideri	Neodevriesiaceae	Capnodiales	Dothideomycetes	Ascomycota	sediment	Qingdao	Neodevriesia metrosideri /2022.10.02	GGGGCCTCGGAGTGAGGCGCTCGCGCGCCCGACCTCCCAACCCTTTGATTTGATCAAGACCTCCTTCTGCCTCGGGGGCGACCCGGACCTCGGCCCGCGGTCCCCCCGGTGGTCACCAACCAAAACTCTGCATCAATTGTCGTCTGAGTATTGAGTAAATTCAATTAAAACTTTCAACAACGGATCTCTTGGTTCTGGCATCGATGAAGAACGCAGCGAAATGCGATAAGTAATGTGAATTGCAGAATTCAGTGAATCATCGAATCTTTGAACGCACATTGCGCCCTTTGGCATTCCGAAGGGCATGCCTGTTCGAGCGTCATTACACCAATCAAGCCTGGCTTGGTATTGGGCGACGGGGCCGTCACACGCCCCGCGCCCCAATGACTCCGGCGGGAC…	97.087%	NR_161141.1
