# Supplementary figures and images for: Screening of Insecticidal and Antifungal Activities of the Culturable Fungi Isolated from the Intertidal Zones of Qingdao, China
Source: MDPI journal article supplement (doi:10.3390/jof8121240), 2022-11-24

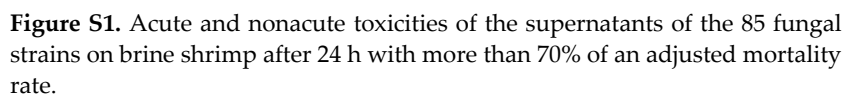

Supplement: s1 [file s1]
